# Supplementary material for: Chemical proteomic profiling reveals prostaglandin termination enzyme PTGR2 as a key molecular target of natural coumarin fraxetin
Source: Royal Society of Chemistry journal article supplement (doi:10.1039/d4cc05681g), 2025-01-01
Supplement: d4cc05681g2.xlsx [file d4cc05681g2.xlsx]

## Sheet: Up-regulated
Significant	‘=-Log10(P-value)	log2FC	Protein IDs	Majority protein IDs	Protein names	Gene names	Fasta headers	Symbol color	Symbol type	Symbol size	Show label	Only identified by site	Reverse	Potential contaminant	Student's T-test Significant LF_L	Student's T-test significant	Peptides	Razor + unique peptides	Unique peptides	Sequence coverage [%]	Unique + razor sequence coverage [%]	Unique sequence coverage [%]	Mol. weight [kDa]	Q-value	Score	Intensity	MS/MS count	-Log Student's T-test p-value LF_L	Student's T-test q-value LF_L	Student's T-test Difference LF_L	Student's T-test Test statistic LF_L	LFQ intensity BC1	LFQ intensity BC2	LFQ intensity BC3	LFQ intensity BC4	LFQ intensity F1	LFQ intensity F2	LFQ intensity F3	LFQ intensity F4	LFQ intensity L1	LFQ intensity L2	LFQ intensity L3	LFQ intensity L4	LFQ intensity LF1	LFQ intensity LF2	LFQ intensity LF3	LFQ intensity LF4
+	5.20183	1.16914	Q9JMH6;Q91Y95;A0A1W2P6U1;Q91Y98;Q9D8I4;A0A0U1RPS1	Q9JMH6;Q91Y95	Thioredoxin reductase 1, cytoplasmic	Txnrd1	Q9JMH6;Q91Y95	Color2 [A=255, R=169, G=169, B=169]	1	4					+	LF_L	20	20	19	47	47	44.5	67.083	0	246.76	34417000000	220	5.20183	0	1.16914	14.6769	28.1712	28.4009	28.1153	28.3206	28.6704	28.2735	28.4311	28.4232	27.9607	27.7341	27.9889	28.0385	28.9778	29.123	29.1745	29.1236
+	5.64201	1.74418	Q3U5H8;Q3U5U6;P14901;Q3TVV4	Q3U5H8;Q3U5U6;P14901	Heme oxygenase 1	Hmox1	Q3U5H8;Q3U5U6;P14901	Color2 [A=255, R=169, G=169, B=169]	1	4					+	LF_L	13	13	13	70.5	70.5	70.5	30.197	0	132.15	99365000000	296	5.64201	0	1.74418	17.4383	25.1097	25.1105	24.7878	24.9287	29.2211	29.2843	29.1821	29.1413	29.2606	29.1019	29.5308	29.1827	31.0823	30.9863	31.0617	30.9224
+	4.86643	1.43999	P35700;B1AXW5;B1AXW6;Q3U9J9;B1AXW4	P35700;B1AXW5;B1AXW6;Q3U9J9;B1AXW4	Peroxiredoxin-1	Prdx1	P35700;B1AXW5;B1AXW6;Q3U9J9;B1AXW4	Color2 [A=255, R=169, G=169, B=169]	1	4					+	LF_L	17	17	16	70.4	70.4	70.4	22.176	0	101.67	350510000000	305	4.86643	0	1.43999	12.8582	31.5541	31.881	31.7105	31.7673	32.1369	31.6748	31.7834	31.9169	31.2062	31.0133	31.4372	31.3147	32.4956	32.7732	32.6784	32.7842
+	2.61814	1.32161	Q4FJZ6;Q3T9P2;O09172;H3BJA3;A0A0G2JDI4;F6VNW5	Q4FJZ6;Q3T9P2;O09172;H3BJA3;A0A0G2JDI4;F6VNW5	Glutamate--cysteine ligase regulatory subunit	Gclm	Q4FJZ6;Q3T9P2;O09172;H3BJA3;A0A0G2JDI4;F6VNW5	Color2 [A=255, R=169, G=169, B=169]	1	4					+	LF_L	8	8	8	40.1	40.1	40.1	30.534	0	88.372	8361000000	80	2.61814	0.00288262	1.32161	5.01789	26.4161	26.8291	26.1272	26.6815	28.482	27.7595	27.9686	28.2297	26.4173	26.4009	26.8603	25.7213	27.4691	27.8658	27.4625	27.8888
+	1.43939	1.86013	P28474;Q6P5I3;A0A0G2JGS3	P28474;Q6P5I3	Alcohol dehydrogenase class-3;S-(hydroxymethyl)glutathione dehydrogenase	Adh5	P28474;Q6P5I3	Color2 [A=255, R=169, G=169, B=169]	1	4					+	LF_L	9	9	8	41.7	41.7	39.6	39.547	0	105.1	6168000000	71	1.43939	0.0286874	1.86013	2.68366	27.9847	28.3148	28.3021	28.4412	28.1072	27.6245	27.7164	27.9684	24.8046	26.28	24.7249	25.3065	25.3887	27.4622	28.0005	27.7052
+	2.97401	1.96673	P28650;Q3UBP0;J3QN31	P28650;Q3UBP0;J3QN31	Adenylosuccinate synthetase isozyme 1	Adssl1	P28650;Q3UBP0;J3QN31	Color2 [A=255, R=169, G=169, B=169]	1	4					+	LF_L	10	10	10	33.9	33.9	33.9	50.254	0	39.355	3988400000	47	2.97401	0.00155599	1.96673	6.7797	26.8324	27.7288	26.9136	28.071	27.2366	26.3648	26.9936	26.4685	23.6008	23.334	NaN	23.6576	26.1672	25.4762	25.1373	25.2095
+	2.03244	1.17671	Q3TF14;P50247;Q3U5U5;Q5M9P0;Q3U4D1;Q8BPI7;A2ALT5	Q3TF14;P50247;Q3U5U5;Q5M9P0;Q3U4D1;Q8BPI7	Adenosylhomocysteinase	Ahcy	Q3TF14;P50247;Q3U5U5;Q5M9P0;Q3U4D1;Q8BPI7	Color2 [A=255, R=169, G=169, B=169]	1	4					+	LF_L	14	14	14	41.4	41.4	41.4	47.688	0	109.34	18310000000	143	2.03244	0.00908982	1.17671	3.77079	28.5391	28.7432	28.4758	28.6208	28.4932	27.8799	28.1237	28.1914	27.3361	26.0757	27.1347	27.415	28.0861	28.1888	28.2324	28.1611
+	4.21345	1.05128	Q540D7;Q3UJW9;Q9JII6;Q80XJ7;Q810X5;B1AXW3	Q540D7;Q3UJW9;Q9JII6;Q80XJ7	Alcohol dehydrogenase [NADP(+)]	Akr1a1	Q540D7;Q3UJW9;Q9JII6;Q80XJ7	Color2 [A=255, R=169, G=169, B=169]	1	4					+	LF_L	10	10	10	42.2	42.2	42.2	36.586	0	143.8	16755000000	105	4.21345	0	1.05128	9.90464	28.5672	28.9107	28.5974	28.7809	28.9085	28.3189	28.5642	28.6888	27.6935	27.6338	27.6395	27.9074	28.539	28.8008	28.7946	28.9448
+	4.34319	1.0324	Q3UDY1;P45376;Q3TCL2;Q5U415;D3YVJ7;Q3ULP0	Q3UDY1;P45376;Q3TCL2;Q5U415;D3YVJ7;Q3ULP0	Aldose reductase	Akr1b3	Q3UDY1;P45376;Q3TCL2;Q5U415;D3YVJ7;Q3ULP0	Color2 [A=255, R=169, G=169, B=169]	1	4					+	LF_L	15	15	14	57.6	57.6	54.1	35.732	0	83.001	42860000000	190	4.34319	0	1.0324	10.4365	29.3906	29.5858	29.2543	29.4836	29.6524	29.258	29.2608	29.34	28.6477	28.495	28.895	28.7363	29.5781	29.7596	29.8278	29.7381
+	4.35866	1.43305	P45377	P45377	Aldose reductase-related protein 2	Akr1b8	P45377	Color2 [A=255, R=169, G=169, B=169]	1	4					+	LF_L	14	14	8	61.4	61.4	43.4	36.12	0	114.99	17141000000	153	4.35866	0	1.43305	10.5016	27.1811	26.3617	27.2013	27.489	28.2694	27.8331	27.9346	28.0312	27.4448	27.244	27.6225	27.4842	28.5661	28.8816	29.0521	29.028
+	2.91007	1.29743	Q9DD05;P10518;Q8VCZ1;O89061	Q9DD05;P10518;Q8VCZ1;O89061	Delta-aminolevulinic acid dehydratase	Alad	Q9DD05;P10518;Q8VCZ1;O89061	Color2 [A=255, R=169, G=169, B=169]	1	4					+	LF_L	8	8	8	42.4	42.4	42.4	36.039	0	93.577	2991900000	45	2.91007	0.00166108	1.29743	5.7267	26.7037	27.1116	26.8567	26.8943	26.7471	26.4132	26.4027	26.9185	25.2806	24.7713	24.4812	25.3446	26.2449	26.3149	26.0329	26.4748
+	2.9485	1.20819	D3Z0B9;A0A1B0GSU0;Q571I9;A0A1B0GSN3;Q9CWT9	D3Z0B9;A0A1B0GSU0;Q571I9	Aldehyde dehydrogenase family 16 member A1	Aldh16a1	D3Z0B9;A0A1B0GSU0;Q571I9	Color2 [A=255, R=169, G=169, B=169]	1	4					+	LF_L	9	9	9	19.5	19.5	19.5	79.488	0	35.811	2532300000	49	2.9485	0.00151434	1.20819	5.82505	26.424	26.6996	26.239	26.6346	26.2369	25.7896	25.7636	25.7146	24.1268	24.2831	25.0155	24.5649	25.7694	25.8738	25.57	25.61
+	4.09133	1.12378	P05063	P05063	Fructose-bisphosphate aldolase C	Aldoc	P05063	Color2 [A=255, R=169, G=169, B=169]	1	4					+	LF_L	16	12	12	58.4	46.8	46.8	39.394	0	90.874	7523700000	106	4.09133	0	1.12378	9.42641	27.1935	27.4001	27.1211	27.3543	27.3007	26.7498	27.0169	26.9132	26.1872	25.8132	26.1315	25.7524	27.2101	26.9864	27.1033	27.0797
+	4.43291	1.01384	Q542G9;P07356;Q3UCD3;Q9CZI7;Q99KH3;B0V2N5;B0V2N7;B0V2N8;REV__F6WNG1;REV__Q8BND4	Q542G9;P07356;Q3UCD3;Q9CZI7;Q99KH3;B0V2N5;B0V2N7	Annexin;Annexin A2	Anxa2	Q542G9;P07356;Q3UCD3;Q9CZI7;Q99KH3;B0V2N5;B0V2N7	Color2 [A=255, R=169, G=169, B=169]	1	4					+	LF_L	25	25	25	65.2	65.2	65.2	38.676	0	285.68	146250000000	326	4.43291	0	1.01384	10.8193	29.7387	29.8193	29.5875	29.8685	30.0032	29.8061	29.9454	29.7211	29.5043	29.3152	29.4937	29.629	30.4408	30.3555	30.6738	30.5276
+	2.12096	1.94084	Q922A2;Q8BP75;Q3TJ49;A0A2C9F2D2;Q07076;Q3UYL7;Q8CCV9;A0A286YCW4	Q922A2;Q8BP75;Q3TJ49;A0A2C9F2D2;Q07076;Q3UYL7;Q8CCV9	Annexin;Annexin A7	Anxa7	Q922A2;Q8BP75;Q3TJ49;A0A2C9F2D2;Q07076;Q3UYL7;Q8CCV9	Color2 [A=255, R=169, G=169, B=169]	1	4					+	LF_L	9	9	9	23.3	23.3	23.3	49.909	0	86.289	4895500000	59	2.12096	0.00815158	1.94084	3.94637	26.7907	26.8179	26.437	27.0553	27.2769	26.8926	25.5326	26.1623	26.3892	26.6922	24.9272	27.2167	28.2814	28.1455	28.3145	28.2474
+	1.42519	1.1501	Q5XJY5;Q3U4S9;Q8R1S6;Q8C0G7;Q3TDU1	Q5XJY5;Q3U4S9;Q8R1S6;Q8C0G7	Coatomer subunit delta	Arcn1	Q5XJY5;Q3U4S9;Q8R1S6;Q8C0G7	Color2 [A=255, R=169, G=169, B=169]	1	4					+	LF_L	15	15	15	38.7	38.7	38.7	57.229	0	48.667	3591400000	63	1.42519	0.0292479	1.1501	2.80957	27.3388	27.0112	26.5101	27.3509	27.1314	26.8118	27.0363	25.9765	NaN	25.3075	25.5822	26.2401	26.2997	26.4476	27.2474	27.4455
+	2.83316	1.43663	Q5FWK3;Q8BQW4;A2AH25;Q8C5A0	Q5FWK3;Q8BQW4;A2AH25;Q8C5A0	Rho GTPase-activating protein 1	Arhgap1	Q5FWK3;Q8BQW4;A2AH25;Q8C5A0	Color2 [A=255, R=169, G=169, B=169]	1	4					+	LF_L	13	13	0	45.3	45.3	0	50.41	0	72.072	8205000000	74	2.83316	0.00194764	1.43663	5.53349	27.4339	27.7251	27.6947	27.6257	27.2799	27.4727	27.5388	27.7327	26.153	26.4041	26.7864	27.1441	28.0754	28.0582	28.3977	27.7029
+	2.01672	1.58194	P70444	P70444	BH3-interacting domain death agonist;BH3-interacting domain death agonist p15;BH3-interacting domain death agonist p13;BH3-interacting domain death agonist p11	Bid	P70444	Color2 [A=255, R=169, G=169, B=169]	1	4					+	LF_L	6	6	6	54.4	54.4	54.4	21.951	0	37.128	2861800000	52	2.01672	0.00944191	1.58194	4.07122	26.3902	26.6359	26.3074	26.9127	26.3941	26.3406	26.5544	26.5471	25.6206	NaN	24.1908	24.7612	26.3828	26.0492	26.6996	26.6262
+	2.94502	1.38906	Q8R016;E9PY26;E9PZH4;E9Q6V3;E9QA53	Q8R016	Bleomycin hydrolase	Blmh	Q8R016	Color2 [A=255, R=169, G=169, B=169]	1	4					+	LF_L	13	13	13	36.5	36.5	36.5	52.511	0	70.985	5099600000	45	2.94502	0.0015057	1.38906	5.81609	27.229	28.0039	26.5438	27.5843	27.6737	27.1982	27.6351	26.9401	25.8953	25.7006	26.3091	26.0731	26.8546	27.314	27.781	27.5848
+	3.95036	1.04531	Q3U6G1;Q923D2;E9PZC3;E9PZC4;A0A0U1RPU7;Q3TP34	Q3U6G1;Q923D2;E9PZC3;E9PZC4;A0A0U1RPU7	Flavin reductase (NADPH)	Blvrb	Q3U6G1;Q923D2;E9PZC3;E9PZC4;A0A0U1RPU7	Color2 [A=255, R=169, G=169, B=169]	1	4					+	LF_L	10	10	10	73.3	73.3	73.3	22.197	0	88.578	23622000000	141	3.95036	0	1.04531	8.90004	28.2496	28.601	28.5336	28.481	29.0019	28.7662	28.7225	28.8641	27.9308	27.9151	28.3295	28.2352	28.9942	29.1856	29.2089	29.2032
+	2.3171	1.79601	Q3U716;Q3UXN3;Q9ER72;A0A140LIB6;Q7TNP6	Q3U716;Q3UXN3;Q9ER72	Cysteine--tRNA ligase, cytoplasmic	Cars	Q3U716;Q3UXN3;Q9ER72	Color2 [A=255, R=169, G=169, B=169]	1	4					+	LF_L	7	7	7	13.4	13.4	13.4	85.55	0	38.192	1183200000	38	2.3171	0.00499524	1.79601	5.655	25.1798	25.7701	26.0692	25.5663	25.1963	24.8993	25.008	24.6722	NaN	NaN	23.1626	23.4996	24.7334	25.2826	24.8764	25.6161
+	3.2379	1.59993	P48758;B2RXY7;A0A338P684	P48758;B2RXY7	Carbonyl reductase [NADPH] 1	Cbr1	P48758;B2RXY7	Color2 [A=255, R=169, G=169, B=169]	1	4					+	LF_L	9	9	5	48	48	26	30.641	0	45.054	2899600000	64	3.2379	0.000358209	1.59993	6.60734	26.0012	26.1872	25.9954	26.265	26.3309	26.2356	26.4078	26.487	23.9503	24.8757	24.0402	24.7586	25.9647	25.9211	26.0803	26.0584
+	2.69375	1.04493	Q61081;A0A1L1STC0	Q61081;A0A1L1STC0	Hsp90 co-chaperone Cdc37;Hsp90 co-chaperone Cdc37, N-terminally processed	Cdc37	Q61081;A0A1L1STC0	Color2 [A=255, R=169, G=169, B=169]	1	4					+	LF_L	9	9	9	34.8	34.8	34.8	44.593	0	74.312	14208000000	72	2.69375	0.00277934	1.04493	5.19522	28.3803	28.6029	28.1479	28.739	28.6773	28.1181	28.3313	28.4043	27.6585	27.1119	27.1025	27.8362	28.3331	28.4126	28.4788	28.6642
+	2.45537	1.15492	Q0VBK8;Q64261;Q3U4J9;A0A0G2JGA8	Q0VBK8;Q64261;Q3U4J9	Cyclin-dependent kinase 6	Cdk6	Q0VBK8;Q64261;Q3U4J9	Color2 [A=255, R=169, G=169, B=169]	1	4					+	LF_L	7	6	6	26.4	23.9	23.9	37.028	0	16.443	782240000	28	2.45537	0.0038799	1.15492	4.64977	24.5393	25.0023	24.0964	24.6756	24.7695	24.1749	24.5795	24.2313	25.0191	24.3464	24.2555	24.7754	26.217	25.5003	25.8079	25.4909
+	1.86705	1.29257	A0A0R4J140;Q5SW19;Z4YLI8;Q6P7U7	A0A0R4J140;Q5SW19;Z4YLI8	Clustered mitochondria protein homolog	Cluh	A0A0R4J140;Q5SW19;Z4YLI8	Color2 [A=255, R=169, G=169, B=169]	1	4					+	LF_L	14	14	14	14.9	14.9	14.9	151.83	0	79.695	2936800000	71	1.86705	0.0117254	1.29257	3.4531	26.4707	26.4139	26.5911	26.3783	26.1684	26.1135	26.0559	26.237	24.7576	24.263	23.6398	25.197	25.8243	25.833	25.2868	26.0836
+	2.62746	1.11778	Q9D1A2;Q6KAT3;Q3TG71;A0A494B9S3;A0A494B9U6	Q9D1A2;Q6KAT3;Q3TG71	Cytosolic non-specific dipeptidase	Cndp2	Q9D1A2;Q6KAT3;Q3TG71	Color2 [A=255, R=169, G=169, B=169]	1	4					+	LF_L	21	21	21	68.8	68.8	68.8	52.767	0	141.5	24662000000	197	2.62746	0.00281791	1.11778	5.0395	27.8479	28.142	27.9628	28.2294	28.3654	27.9737	28.1276	28.0705	27.3894	27.0198	27.7895	27.9711	28.4696	28.7284	28.7069	28.7361
+	2.06943	1.44779	O35864;A0A087WQA8;Q3V0K7;A0A087WQ60	O35864	COP9 signalosome complex subunit 5	Cops5	O35864	Color2 [A=255, R=169, G=169, B=169]	1	4					+	LF_L	8	8	8	32.9	32.9	32.9	37.548	0	21.061	1876900000	52	2.06943	0.00868233	1.44779	4.19597	25.6772	25.9751	25.3465	25.8119	26.0522	25.6556	25.5647	25.5365	23.9113	24.8567	25.0562	24.0478	NaN	25.7941	26.0624	25.8909
+	1.95039	1.24723	Q8VBV7;A0A087WPM5	Q8VBV7	COP9 signalosome complex subunit 8	Cops8	Q8VBV7	Color2 [A=255, R=169, G=169, B=169]	1	4					+	LF_L	5	5	5	42.6	42.6	42.6	23.255	0	31.834	2400800000	31	1.95039	0.0108053	1.24723	3.91749	26.5305	26.0266	26.2956	26.4776	26.5264	26.3096	26.3084	26.0349	25.2754	25.5585	25.3889	NaN	26.1178	27.0654	26.292	27.1442
+	2.63807	1.09341	Q571A1;Q3U893;Q8C166;B7ZCP4;B7ZCP7;F6R587;B7ZCP6;E9Q806;B7ZCP5;A3KGK7	Q571A1;Q3U893;Q8C166;B7ZCP4	Copine-1	Cpne1	Q571A1;Q3U893;Q8C166;B7ZCP4	Color2 [A=255, R=169, G=169, B=169]	1	4					+	LF_L	5	5	5	11.7	11.7	11.7	45.006	0	27.344	2399900000	41	2.63807	0.0028391	1.09341	5.06422	26.5576	26.8845	26.1633	26.4279	26.3394	25.7561	25.9681	26.2345	25.0324	24.8622	24.4413	25.4608	26.0114	25.9989	25.9811	26.179
+	1.95353	1.49895	Q2M4H5;Q9D5V5;E9PV12;G3X914;E9Q6Z0;Q8BYN6;Q05CY9;Q78GU9;F8VQI6	Q2M4H5;Q9D5V5;E9PV12;G3X914;E9Q6Z0;Q8BYN6	Cullin-5	Cul5	Q2M4H5;Q9D5V5;E9PV12;G3X914;E9Q6Z0;Q8BYN6	Color2 [A=255, R=169, G=169, B=169]	1	4					+	LF_L	13	13	13	18.1	18.1	18.1	90.973	0	40.296	1453200000	57	1.95353	0.0108467	1.49895	3.61758	25.3057	25.3807	25.2302	25.1666	25.3635	25.026	25.0537	25.0541	24.821	24.0868	23.7894	24.2736	24.7708	26.1977	26.3246	25.6735
+	1.48676	1.43649	Q3TB96;Q3T9V8;E9Q586;E9Q3M3;Q6NZM3;O08788;D3YX34;Q3TRF1;D3Z2M9;D3YYG9	Q3TB96;Q3T9V8;E9Q586;E9Q3M3;Q6NZM3;O08788;D3YX34	Dynactin subunit 1	Dctn1	Q3TB96;Q3T9V8;E9Q586;E9Q3M3;Q6NZM3;O08788;D3YX34	Color2 [A=255, R=169, G=169, B=169]	1	4					+	LF_L	18	18	18	22.8	22.8	22.8	136.81	0	133.31	3387500000	103	1.48676	0.0257279	1.43649	2.76582	26.1857	26.195	26.1931	25.6304	25.9004	25.6216	25.8272	25.5687	22.9449	25.2561	24.179	24.8658	25.4693	25.6622	25.9116	25.9488
+	1.92355	1.77183	Q8K1M6;E9PUD2;A0A2U3TZ67	Q8K1M6;E9PUD2;A0A2U3TZ67	Dynamin-1-like protein	Dnm1l	Q8K1M6;E9PUD2;A0A2U3TZ67	Color2 [A=255, R=169, G=169, B=169]	1	4					+	LF_L	17	17	2	31.9	31.9	5.1	82.657	0	134.98	6153900000	118	1.92355	0.0109241	1.77183	3.56016	26.8856	26.9273	26.7335	27.0262	26.7231	26.2018	26.9767	26.8195	25.2612	23.3793	25.1088	25.5084	26.257	26.7064	26.6867	26.695
+	3.56877	1.09872	Q3T9X3;F8WIV5;P39054;G3UZZ3;Q91Z39;A0A0J9YUE9;A0A0J9YUN4;P39053;G3UY64	Q3T9X3;F8WIV5;P39054;G3UZZ3	Dynamin-2	Dnm2	Q3T9X3;F8WIV5;P39054;G3UZZ3	Color2 [A=255, R=169, G=169, B=169]	1	4					+	LF_L	16	16	2	25.7	25.7	3.4	97.194	0	116.3	8354900000	148	3.56877	0	1.09872	7.60123	27.1546	27.5755	27.4296	27.4322	27.5697	26.9737	27.1999	27.3461	26.4694	26.1869	25.9561	26.437	27.1779	27.3083	27.3962	27.5619
+	1.52981	1.09684	Q4FK36;Q9R0P5	Q4FK36;Q9R0P5	Destrin	Dstn	Q4FK36;Q9R0P5	Color2 [A=255, R=169, G=169, B=169]	1	4					+	LF_L	7	7	7	47.9	47.9	47.9	18.521	0	59.792	6944500000	64	1.52981	0.0235812	1.09684	2.84108	27.7023	28.0997	28.3526	28.0363	28.0824	27.7863	27.789	27.9594	27.1739	27.1137	25.7547	27.4437	27.7952	27.9825	27.9453	28.1504
+	1.76304	1.40535	Q6PDI5;A2ALV7;A2ALV6;A2ALV8;Q8C2Z1;Q8C9Q5;A2ALW1;A2ALV9	Q6PDI5;A2ALV7;A2ALV6	Proteasome-associated protein ECM29 homolog	Ecm29	Q6PDI5;A2ALV7;A2ALV6	Color2 [A=255, R=169, G=169, B=169]	1	4					+	LF_L	22	22	22	17.6	17.6	17.6	203.7	0	121.06	3924400000	116	1.76304	0.0155597	1.40535	3.25963	25.899	26.5227	26.106	26.1568	26.0651	25.7307	25.8515	25.9896	25.7072	23.9518	23.955	24.9592	25.8989	25.9987	26.1159	26.1811
+	3.22619	1.19233	Q8BL66;Q05CS7;Q3TQY5;A0A1W2P7A6	Q8BL66;Q05CS7	Early endosome antigen 1	Eea1	Q8BL66;Q05CS7	Color2 [A=255, R=169, G=169, B=169]	1	4					+	LF_L	13	13	13	10.6	10.6	10.6	160.91	0	42.594	2143300000	68	3.22619	0.00035468	1.19233	6.57418	25.0874	24.6481	25.3059	24.7063	25.3078	25.1082	24.9814	25.1873	24.718	25.0411	24.9919	25.5263	26.2287	26.083	26.3553	26.3796
+	1.6229	1.13852	Q8BTX5;Q5M9L0;Q91WK2;Q3TIK5;Q3TII2;Q3THW7;Q8BMZ8	Q8BTX5;Q5M9L0;Q91WK2;Q3TIK5;Q3TII2;Q3THW7	Eukaryotic translation initiation factor 3 subunit H	Eif3h	Q8BTX5;Q5M9L0;Q91WK2;Q3TIK5;Q3TII2;Q3THW7	Color2 [A=255, R=169, G=169, B=169]	1	4					+	LF_L	12	12	12	50.3	50.3	50.3	39.846	0	88.434	6504400000	71	1.6229	0.0197766	1.13852	3.00582	26.7935	26.799	27.6353	27.8633	27.8364	26.7792	27.6781	27.2956	26.5933	25.9331	27.0614	26.5911	26.8229	27.8566	27.8399	28.2135
+	2.11418	1.07647	Q3TDD8;Q3UGC0;Q3TSY9;Q3THB0;Q8BGD9;Q3TLQ9;B2RWE8;Q922K6	Q3TDD8;Q3UGC0;Q3TSY9;Q3THB0;Q8BGD9;Q3TLQ9;B2RWE8	Eukaryotic translation initiation factor 4B	Eif4b	Q3TDD8;Q3UGC0;Q3TSY9;Q3THB0;Q8BGD9;Q3TLQ9;B2RWE8	Color2 [A=255, R=169, G=169, B=169]	1	4					+	LF_L	9	9	9	21.2	21.2	21.2	68.709	0	77.796	6188200000	68	2.11418	0.00810042	1.07647	3.93278	27.3283	27.6373	27.247	27.5182	27.1658	26.7842	26.7609	27.0762	26.4574	26.1246	26.1822	25.2192	27.1555	26.9333	27.143	27.0576
+	2.35375	1.15728	A7ISP9;F8WJ93;Q3UMY5;A0A0R4J0H0;A0A0R4J1G7;A0A3Q4EHV9;Q3TGL8	A7ISP9;F8WJ93;Q3UMY5;A0A0R4J0H0;A0A0R4J1G7;A0A3Q4EHV9;Q3TGL8	Echinoderm microtubule-associated protein-like 4	Eml4	A7ISP9;F8WJ93;Q3UMY5;A0A0R4J0H0;A0A0R4J1G7;A0A3Q4EHV9;Q3TGL8	Color2 [A=255, R=169, G=169, B=169]	1	4					+	LF_L	5	5	5	6.3	6.3	6.3	108.71	0	29.009	1385900000	46	2.35375	0.00465366	1.15728	4.91191	25.2374	25.6971	25.7391	25.6948	25.4782	25.0838	25.398	25.4322	23.5391	NaN	24.2096	24.4814	25.2094	25.2826	25.2544	25.1894
+	4.97614	1.27369	H3BKH6;Q9R0P3;H3BLJ9;H3BJL6;H3BJP2;H3BK43;H3BJC6;H3BL99	H3BKH6;Q9R0P3;H3BLJ9;H3BJL6;H3BJP2;H3BK43	S-formylglutathione hydrolase	Esd	H3BKH6;Q9R0P3;H3BLJ9;H3BJL6;H3BJP2;H3BK43	Color2 [A=255, R=169, G=169, B=169]	1	4					+	LF_L	16	16	16	82	82	82	32.829	0	261.9	85213000000	294	4.97614	0	1.27369	13.4282	29.1523	29.4875	29.1311	29.3328	29.8011	29.431	29.4847	29.5516	29.1007	28.8744	29.1325	29.1722	30.1687	30.3371	30.3741	30.4947
+	1.94634	1.95083	Q3UW53;E9PYV4;Q3TDH5;D3Z233;D3YYZ9	Q3UW53;E9PYV4;Q3TDH5	Protein Niban	Fam129a	Q3UW53;E9PYV4;Q3TDH5	Color2 [A=255, R=169, G=169, B=169]	1	4					+	LF_L	13	13	13	19.4	19.4	19.4	102.65	0	85.842	4806900000	84	1.94634	0.0107643	1.95083	3.60377	26.4778	26.6866	26.7772	26.5293	26.9584	26.7323	26.8622	26.9518	23.3688	24.6901	25.4308	25.6957	27.1442	26.7886	26.5422	26.5138
+	3.98708	1.06426	Q8R1F1;A2ARS6	Q8R1F1	Niban-like protein 1	Fam129b	Q8R1F1	Color2 [A=255, R=169, G=169, B=169]	1	4					+	LF_L	18	18	18	38.1	38.1	38.1	84.818	0	119.74	9170800000	115	3.98708	0	1.06426	9.03456	26.6619	26.9373	26.7638	26.9557	26.9773	26.6179	26.7862	26.9135	26.2737	26.2506	26.1353	26.5592	27.1509	27.3805	27.4634	27.481
+	2.18136	1.08134	Q9CZD3;Q9DBT1	Q9CZD3	Glycine--tRNA ligase	Gars	Q9CZD3	Color2 [A=255, R=169, G=169, B=169]	1	4					+	LF_L	22	22	22	33.3	33.3	33.3	81.877	0	144.76	13241000000	146	2.18136	0.0074874	1.08134	4.06859	27.5653	27.8612	27.6147	27.7922	27.7918	27.4428	27.5574	27.6537	26.9913	25.966	27.0111	26.8448	27.5527	27.8329	27.7473	28.0056
+	3.95644	1.70051	Q8BT78;Q8C7E6;G3UW30;F6ZHD8;Q9D6Y9	Q8BT78;Q8C7E6;G3UW30;F6ZHD8;Q9D6Y9	1,4-alpha-glucan-branching enzyme	Gbe1	Q8BT78;Q8C7E6;G3UW30;F6ZHD8;Q9D6Y9	Color2 [A=255, R=169, G=169, B=169]	1	4					+	LF_L	2	2	2	19.6	19.6	19.6	12.023	0	4.5364	308500000	12	3.95644	0	1.70051	15.1538	NaN	NaN	24.6484	24.6581	NaN	24.8462	NaN	24.8205	23.5069	23.7355	NaN	NaN	25.281	25.1857	25.4614	25.3586
+	1.86369	1.56133	A5GZX3;Q9CPU0;A0A494BAF7;A0A494BBE7;A0A494B970	A5GZX3;Q9CPU0;A0A494BAF7;A0A494BBE7	Lactoylglutathione lyase	Glo1	A5GZX3;Q9CPU0;A0A494BAF7;A0A494BBE7	Color2 [A=255, R=169, G=169, B=169]	1	4					+	LF_L	9	9	8	63	63	59.2	20.809	0	24.795	6607200000	68	1.86369	0.0118809	1.56133	3.44677	27.397	27.9473	27.7043	27.76	27.7088	26.6879	27.2703	27.1555	26.3512	25.5474	24.1893	25.0981	26.8135	26.761	26.9175	26.9393
+	2.41332	2.14536	Q9CQM9;A0A1B0GS58;A0A1B0GT04;A0A1B0GSD3	Q9CQM9;A0A1B0GS58	Glutaredoxin-3	Glrx3	Q9CQM9;A0A1B0GS58	Color2 [A=255, R=169, G=169, B=169]	1	4					+	LF_L	14	14	14	61.7	61.7	61.7	37.778	0	101.56	12183000000	80	2.41332	0.00413758	2.14536	4.55758	28.1647	28.629	28.2362	29.3549	28.4427	27.9598	28.0392	28.2691	25.7238	25.4615	26.6335	27.2925	28.081	28.861	28.0465	28.7042
+	2.8395	1.0409	E9PWH6;Q3USC0;Q8BQM4;Q8K2Q1;Q3TQJ6;Q80VH5	E9PWH6;Q3USC0;Q8BQM4;Q8K2Q1	HEAT repeat-containing protein 3	Heatr3	E9PWH6;Q3USC0;Q8BQM4;Q8K2Q1	Color2 [A=255, R=169, G=169, B=169]	1	4					+	LF_L	6	6	6	17.6	17.6	17.6	61.889	0	16.397	613910000	21	2.8395	0.00195789	1.0409	5.54926	24.9688	25.5503	24.4863	25.3999	25.2897	24.7761	24.8007	25.1495	24.3814	23.682	23.8992	24.4371	25.059	25.1118	25.2135	25.179
+	2.89441	1.1255	Q99M31	Q99M31	Heat shock 70 kDa protein 14	Hspa14	Q99M31	Color2 [A=255, R=169, G=169, B=169]	1	4					+	LF_L	10	10	10	27.1	27.1	27.1	54.65	0	48.863	2573100000	50	2.89441	0.00163971	1.1255	8.07912	26.9605	26.6274	26.5649	26.9933	26.9162	26.5797	26.5231	26.421	NaN	25.3061	25.3555	NaN	26.7221	26.432	26.3662	26.3049
+	3.96543	1.0719	Q61699;E9Q0U7;Q8C6H1;D3Z3I9;A0A0J9YTZ7;D3Z027	Q61699;E9Q0U7	Heat shock protein 105 kDa	Hsph1	Q61699;E9Q0U7	Color2 [A=255, R=169, G=169, B=169]	1	4					+	LF_L	23	22	22	39	37.4	37.4	96.406	0	145.89	7101300000	126	3.96543	0	1.0719	8.95502	26.5359	26.8057	25.9749	26.8149	26.908	26.3047	26.7778	26.5942	26.3874	26.2169	26.0698	26.5993	27.3057	27.438	27.3537	27.4637
+	2.3375	1.28909	Q8CGB9;Q9JHR7;Q8CE37	Q8CGB9;Q9JHR7	Insulin-degrading enzyme	Ide	Q8CGB9;Q9JHR7	Color2 [A=255, R=169, G=169, B=169]	1	4					+	LF_L	14	14	14	16.8	16.8	16.8	117.69	0	24.665	3972200000	53	2.3375	0.00498558	1.28909	4.39416	26.8328	26.8728	26.6242	27.0025	26.6288	26.292	26.6918	26.6047	25.5664	24.6604	25.0265	25.9043	26.7723	26.6596	26.5658	26.3162
+	2.86845	1.13692	Q5HZJ8;Q8C338;O88844;Q3TJ51;Q0QER9;A0A087WPT4;A0A087WRS9;D3YVY3;A0A087WRM4	Q5HZJ8;Q8C338;O88844;Q3TJ51;Q0QER9	Isocitrate dehydrogenase [NADP];Isocitrate dehydrogenase [NADP] cytoplasmic	Idh1	Q5HZJ8;Q8C338;O88844;Q3TJ51;Q0QER9	Color2 [A=255, R=169, G=169, B=169]	1	4					+	LF_L	17	16	16	49.5	47.3	47.3	46.674	0	83.513	12039000000	122	2.86845	0.00178175	1.13692	5.62155	27.7475	27.8827	27.9655	28.0846	28.1122	27.7343	27.8674	27.8329	26.6954	26.0773	26.8368	26.1472	27.4379	27.7	27.4927	27.6738
+	1.96637	1.3275	Q9D066;Q924B0;Q3U5R8;Q3TME6;O55023;Q80ZJ2;A0A0A6YW07;D3Z703	Q9D066;Q924B0;Q3U5R8;Q3TME6;O55023;Q80ZJ2	Inositol monophosphatase 1	Impa1	Q9D066;Q924B0;Q3U5R8;Q3TME6;O55023;Q80ZJ2	Color2 [A=255, R=169, G=169, B=169]	1	4					+	LF_L	6	6	5	24.5	24.5	20.9	30.395	0	17.983	4017600000	49	1.96637	0.0104355	1.3275	3.64231	26.8207	27.1689	26.8703	27.1221	26.9168	26.6287	26.6483	26.899	25.9442	25.2833	24.7412	26.2991	26.8109	26.939	26.6458	27.1821
+	1.93424	1.33822	Q8VI75;Q5U4C5;D6RES6	Q8VI75;Q5U4C5	Importin-4	Ipo4	Q8VI75;Q5U4C5	Color2 [A=255, R=169, G=169, B=169]	1	4					+	LF_L	12	12	12	18	18	18	119.27	0	50.906	1586900000	47	1.93424	0.0109008	1.33822	3.5806	25.5267	26.3239	24.9466	25.6452	25.3149	25.3554	25.371	24.913	25.2005	24.996	24.0772	25.0789	25.6802	25.7525	26.5062	26.7666
+	2.12789	1.20379	Q9EPL8;A0A140LHD0	Q9EPL8	Importin-7	Ipo7	Q9EPL8	Color2 [A=255, R=169, G=169, B=169]	1	4					+	LF_L	23	23	21	33.8	33.8	31.2	119.49	0	99.66	10207000000	156	2.12789	0.00788596	1.20379	3.9603	26.868	27.1509	26.8348	27.0231	27.0523	26.2783	26.6641	26.8265	26.496	25.1695	26.1195	26.2525	26.9608	27.2596	27.3805	27.2517
+	3.78396	1.07422	Q9D892;Q60I30;Q3U589	Q9D892;Q60I30;Q3U589	Inosine triphosphate pyrophosphatase	Itpa	Q9D892;Q60I30;Q3U589	Color2 [A=255, R=169, G=169, B=169]	1	4					+	LF_L	6	6	6	44.4	44.4	44.4	21.897	0	66.377	3834300000	53	3.78396	0	1.07422	8.31196	26.5648	26.8627	26.7356	26.8435	26.7393	26.2438	26.5145	26.5972	25.3437	25.2016	25.4949	25.7482	26.3582	26.581	26.5507	26.5953
+	3.53635	1.92191	A0A0R4J2B2;Q6WVG3;Q69ZA6;Q8CBQ4;Q14AX3;Q8C2V2;Q5DTY9	A0A0R4J2B2;Q6WVG3;Q69ZA6	BTB/POZ domain-containing protein KCTD12	Kctd12	A0A0R4J2B2;Q6WVG3;Q69ZA6	Color2 [A=255, R=169, G=169, B=169]	1	4					+	LF_L	9	9	9	46.2	46.2	46.2	35.888	0	73.219	2419200000	34	3.53635	0	1.92191	7.49872	NaN	NaN	NaN	NaN	22.9937	NaN	NaN	NaN	25.8238	24.886	25.8342	25.8986	27.4578	27.597	27.3441	27.7313
+	2.43418	1.166	Q543N3;Q61792;A2A6H0;A2A6G9;A2A6G6;A2A6G7;A2A6G8;A2A6H1;A2A6G5;E9Q0N6;A2A6G0;A2A6G4	Q543N3;Q61792;A2A6H0;A2A6G9;A2A6G6;A2A6G7;A2A6G8	LIM and SH3 domain protein 1	Lasp1	Q543N3;Q61792;A2A6H0;A2A6G9;A2A6G6;A2A6G7;A2A6G8	Color2 [A=255, R=169, G=169, B=169]	1	4					+	LF_L	7	7	7	29.3	29.3	29.3	29.994	0	36.548	5764000000	46	2.43418	0.00392298	1.166	4.60317	27.1936	27.3302	27.9181	27.7521	27.6032	26.897	27.3305	26.9631	26.1268	26.2183	26.7292	26.5306	27.048	27.4888	28.0692	27.663
+	3.82071	2.74154	P24527	P24527	Leukotriene A-4 hydrolase	Lta4h	P24527	Color2 [A=255, R=169, G=169, B=169]	1	4					+	LF_L	13	13	13	29.5	29.5	29.5	69.05	0	76.194	2357400000	59	3.82071	0	2.74154	10.2603	25.9762	26.8295	26.2284	26.6632	26.1764	25.1129	25.7521	25.8192	NaN	22.8314	23.3329	22.9457	25.8256	25.2565	25.8071	26.2237
+	1.9726	1.04943	Q3U4H0;Q61166;A0A0J9YVB9;D3Z6G3;Q2UZW7;Q6PER3	Q3U4H0;Q61166	Microtubule-associated protein RP/EB family member 1	Mapre1	Q3U4H0;Q61166	Color2 [A=255, R=169, G=169, B=169]	1	4					+	LF_L	12	12	11	66.8	66.8	63.8	30.016	0	82.619	4721600000	70	1.9726	0.0101429	1.04943	3.65432	27.2391	27.4553	27.2418	27.0449	27.0069	26.7514	26.8805	26.956	26.1389	25.1751	26.2311	26.4099	26.9855	27.0307	26.8888	27.2477
+	1.6803	1.79897	Q3UJN1;P97310;Q3UK39;A0A0N4SVY2	Q3UJN1;P97310;Q3UK39	DNA helicase;DNA replication licensing factor MCM2	Mcm2	Q3UJN1;P97310;Q3UK39	Color2 [A=255, R=169, G=169, B=169]	1	4					+	LF_L	24	24	24	33.6	33.6	33.6	103.15	0	198.06	9751600000	126	1.6803	0.0176315	1.79897	3.10889	27.9033	28.2358	28.008	28.2166	27.4858	26.2927	26.9329	26.9958	23.3681	23.053	24.1745	25.2218	24.9558	26.0328	25.5888	26.4359
+	1.48592	1.29449	Q542I2;P97311;Q3ULG5;Q3UC10;Q8C5L1	Q542I2;P97311;Q3ULG5;Q3UC10;Q8C5L1	DNA helicase;DNA replication licensing factor MCM6	Mcm6	Q542I2;P97311;Q3ULG5;Q3UC10;Q8C5L1	Color2 [A=255, R=169, G=169, B=169]	1	4					+	LF_L	23	23	23	39.8	39.8	39.8	92.866	0	150.24	13026000000	161	1.48592	0.0257093	1.29449	2.76437	27.9036	28.1389	28.1627	28.1828	28.003	27.205	27.6172	27.6311	25.6422	24.2349	25.2047	26.3444	26.2116	26.6621	26.8023	26.9282
+	1.33048	1.29999	Q3UDI8;Q3U4T8;Q61881;Q3V122;D3Z6N3	Q3UDI8;Q3U4T8;Q61881;Q3V122	DNA helicase;DNA replication licensing factor MCM7	Mcm7	Q3UDI8;Q3U4T8;Q61881;Q3V122	Color2 [A=255, R=169, G=169, B=169]	1	4					+	LF_L	18	18	18	34.8	34.8	34.8	81.196	0	107.19	8798300000	127	1.33048	0.0373658	1.29999	2.49694	27.6678	27.9893	27.7698	27.8423	27.3127	27.0268	27.1278	27.2155	25.2826	24.8134	23.7971	25.943	25.5285	26.4599	26.3065	26.7411
+	2.60627	1.72628	Q3TWT2;Q91VH6;A0A3B2W7C9;A0A3F2YNL8;A0A3B2W4I2;A0A3B2WCC1	Q3TWT2;Q91VH6;A0A3B2W7C9;A0A3F2YNL8	Protein MEMO1	Memo1	Q3TWT2;Q91VH6;A0A3B2W7C9;A0A3F2YNL8	Color2 [A=255, R=169, G=169, B=169]	1	4					+	LF_L	5	5	5	25.8	25.8	25.8	34.3	0	36.212	2059300000	61	2.60627	0.00301176	1.72628	4.99042	26.1092	26.4448	26.2248	26.5205	26.2282	25.8888	26.2887	25.9713	24.6065	23.285	24.0321	24.8065	25.9596	25.8006	26.0442	25.8309
+	3.34582	3.10415	Q58E65;Q3UI33;O08663;Q3TMN1;M0QW48;M0QWM9;M0QW69;Q3TMZ6;M0QWX0	Q58E65;Q3UI33;O08663;Q3TMN1;M0QW48	Methionine aminopeptidase 2	Metap2	Q58E65;Q3UI33;O08663;Q3TMN1;M0QW48	Color2 [A=255, R=169, G=169, B=169]	1	4					+	LF_L	15	15	15	41.8	41.8	41.8	52.921	0	115.62	7049400000	125	3.34582	0	3.10415	6.91916	27.2775	27.3251	27.3035	27.4587	27.5287	27.2999	27.3366	27.3561	24.7152	24.0639	22.5933	23.7328	26.9982	26.7331	26.8129	26.9776
+	2.74741	1.40913	Q9CQ65	Q9CQ65	S-methyl-5-thioadenosine phosphorylase	Mtap	Q9CQ65	Color2 [A=255, R=169, G=169, B=169]	1	4					+	LF_L	10	10	10	45.9	45.9	45.9	31.062	0	51.12	3366100000	47	2.74741	0.0024065	1.40913	7.38885	26.7558	27.2757	26.7552	27.2104	26.8591	26.3624	26.5391	26.5704	25.2033	NaN	25.3659	NaN	26.3375	26.8667	26.8451	26.7259
+	2.00086	1.28326	Q3TLX1;Q99KQ4	Q3TLX1;Q99KQ4	Nicotinamide phosphoribosyltransferase	Nampt	Q3TLX1;Q99KQ4	Color2 [A=255, R=169, G=169, B=169]	1	4					+	LF_L	10	10	10	36.3	36.3	36.3	55.462	0	39.922	3989200000	62	2.00086	0.00948293	1.28326	3.7091	26.6784	27.0887	26.4149	26.9587	26.9527	26.4877	26.3511	26.7303	26.0785	25.7331	24.7943	26.3259	26.8742	26.8872	27.2251	27.0784
+	3.21798	1.48917	Q1PCS1;O70145;A0A087WPH0;Q3TBY8	Q1PCS1;O70145	Neutrophil cytosol factor 2	Ncf2	Q1PCS1;O70145	Color2 [A=255, R=169, G=169, B=169]	1	4					+	LF_L	12	12	12	33.7	33.7	33.7	59.457	0	34.644	2995900000	69	3.21798	0.00035122	1.48917	6.55102	25.7544	26.2051	25.602	26.0543	26.5815	25.936	26.459	26.2945	24.8305	25.6939	25.4186	25.5533	26.5286	26.8399	27.1186	26.9658
+	3.06414	1.22691	Q3UV15;Q3ULT8;Q3UG25;Q9WTK5;A0A494B9Y5;Q3U5V4;Q4U105;Q4U108;A0A494BAQ2	Q3UV15;Q3ULT8;Q3UG25;Q9WTK5;A0A494B9Y5;Q3U5V4;Q4U105;Q4U108;A0A494BAQ2	Nuclear factor NF-kappa-B p100 subunit;Nuclear factor NF-kappa-B p52 subunit	Nfkb2	Q3UV15;Q3ULT8;Q3UG25;Q9WTK5;A0A494B9Y5;Q3U5V4;Q4U105;Q4U108;A0A494BAQ2	Color2 [A=255, R=169, G=169, B=169]	1	4					+	LF_L	15	15	15	24.9	24.9	24.9	96.877	0	73.188	3398200000	65	3.06414	0.000653928	1.22691	6.12863	NaN	22.7505	23.0648	23.0249	23.9609	NaN	24.0676	22.9125	26.3695	26.3483	25.6192	25.8049	27.1448	27.2655	27.2084	27.4308
+	2.151	1.9102	A6PWC3;A2A9Q2;Q8BHG1;Q8R320;Q8R1H1;Q9Z153;Q3V3G9	A6PWC3;A2A9Q2;Q8BHG1;Q8R320;Q8R1H1	Nardilysin	Nrd1	A6PWC3;A2A9Q2;Q8BHG1;Q8R320;Q8R1H1	Color2 [A=255, R=169, G=169, B=169]	1	4					+	LF_L	17	17	17	20.3	20.3	20.3	127.77	0	76.099	2706800000	91	2.151	0.0076841	1.9102	4.00692	25.8377	26.3369	25.6527	25.9959	26.113	25.3638	25.6534	26.0065	25.0622	23.8637	22.7593	23.5831	25.7064	25.7461	25.7411	25.7157
+	2.06258	1.26444	Q3U8H8;P61971	Q3U8H8;P61971	Nuclear transport factor 2	Nutf2	Q3U8H8;P61971	Color2 [A=255, R=169, G=169, B=169]	1	4					+	LF_L	5	5	5	56.7	56.7	56.7	14.379	0	31.051	6493100000	48	2.06258	0.00868223	1.26444	3.8301	27.4141	27.7226	27.4442	27.6901	27.3865	27.0795	27.0962	27.3313	26.103	24.9552	26.3275	25.8337	26.7213	26.9837	27.2684	27.3038
+	3.90592	1.02047	A2A813;Q99LX0;A2A815;D3K2X3;A2A817;A2A816	A2A813;Q99LX0;A2A815;D3K2X3;A2A817;A2A816	Protein deglycase DJ-1	Park7	A2A813;Q99LX0;A2A815;D3K2X3;A2A817;A2A816	Color2 [A=255, R=169, G=169, B=169]	1	4					+	LF_L	11	11	11	71.4	71.4	71.4	18.474	0	49.792	13165000000	115	3.90592	0	1.02047	8.73953	27.9801	28.3435	28.3162	28.5157	28.3686	27.8475	27.9814	28.0996	26.7114	26.8503	26.9674	26.8246	27.5648	27.9017	28.0573	27.9117
+	2.01472	1.27375	P49586;D3Z3T5;Q811Q9	P49586;D3Z3T5;Q811Q9	Choline-phosphate cytidylyltransferase A;Choline-phosphate cytidylyltransferase B	Pcyt1a	P49586;D3Z3T5;Q811Q9	Color2 [A=255, R=169, G=169, B=169]	1	4					+	LF_L	6	6	6	24	24	24	41.666	0	49.138	3036000000	65	2.01472	0.00942319	1.27375	3.73611	25.6379	25.9063	25.5033	25.7846	25.6408	25.67	25.819	25.6886	25.2897	24.1714	25.4719	25.6557	26.3335	26.447	26.6068	26.2964
+	1.85161	1.12251	Q3UHX2;B2RTB0;Q1WWJ8	Q3UHX2;B2RTB0;Q1WWJ8	28 kDa heat- and acid-stable phosphoprotein	Pdap1	Q3UHX2;B2RTB0;Q1WWJ8	Color2 [A=255, R=169, G=169, B=169]	1	4					+	LF_L	5	5	5	31.5	31.5	31.5	20.605	0	42.417	4701000000	55	1.85161	0.012297	1.12251	3.42408	27.7016	27.812	27.7338	27.8097	27.5311	27.2845	27.4095	27.3429	26.7119	26.0643	25.4249	26.7732	27.4233	27.2591	27.2018	27.5801
+	4.7466	1.01037	Q8C605;Q9WUA3;Q9D255;Q8C8E8;D3YUA3;F6YL81	Q8C605;Q9WUA3	ATP-dependent 6-phosphofructokinase;ATP-dependent 6-phosphofructokinase, platelet type	Pfkp	Q8C605;Q9WUA3	Color2 [A=255, R=169, G=169, B=169]	1	4					+	LF_L	20	20	18	36.7	36.7	33.2	85.546	0	210.17	9119000000	160	4.7466	0	1.01037	12.2615	26.4102	26.6816	26.5033	26.8661	26.832	26.3786	26.6877	26.6486	26.1998	26.0138	26.0682	26.1718	26.9406	27.1245	27.2799	27.1503
+	4.71741	1.1001	Q91V28;Q9DCD0;Q3UAG2;Q91YT9	Q91V28;Q9DCD0;Q3UAG2;Q91YT9	6-phosphogluconate dehydrogenase, decarboxylating	Pgd	Q91V28;Q9DCD0;Q3UAG2;Q91YT9	Color2 [A=255, R=169, G=169, B=169]	1	4					+	LF_L	27	27	27	66.5	66.5	66.5	53.261	0	304	137150000000	405	4.71741	0	1.1001	12.1202	30.3303	30.4155	30.3215	30.5777	30.9078	30.5306	30.7156	30.6433	29.415	29.2063	29.2904	29.5435	30.3131	30.4842	30.4965	30.5617
+	2.28297	2.12073	Q5RJV4;Q7TNU0;Q66JR7;Q9D0F9;Q3U6X6;A2CEK3;Q99JW6;B0LAB9	Q5RJV4;Q7TNU0;Q66JR7;Q9D0F9;Q3U6X6;A2CEK3	Phosphoglucomutase-1	Pgm2	Q5RJV4;Q7TNU0;Q66JR7;Q9D0F9;Q3U6X6;A2CEK3	Color2 [A=255, R=169, G=169, B=169]	1	4					+	LF_L	12	12	12	34	34	34	61.383	0	61.496	4247700000	79	2.28297	0.00555168	2.12073	4.27883	26.6009	26.4769	26.251	26.9617	26.9857	26.4406	26.4333	26.4144	25.1382	23.6168	23.3487	24.9482	26.3959	26.6687	26.6433	25.8268
+	3.96862	1.14448	Q9EQ32	Q9EQ32	Phosphoinositide 3-kinase adapter protein 1	Pik3ap1	Q9EQ32	Color2 [A=255, R=169, G=169, B=169]	1	4					+	LF_L	7	7	7	14.4	14.4	14.4	90.927	0	22.877	1202700000	35	3.96862	0	1.14448	8.96673	24.7774	NaN	24.7036	24.952	25.3432	NaN	24.6324	NaN	25.0177	25.348	25.3643	25.339	26.6378	26.2054	26.4974	26.3064
+	2.73372	1.10662	P27612;F7D1R5	P27612	Phospholipase A-2-activating protein	Plaa	P27612	Color2 [A=255, R=169, G=169, B=169]	1	4					+	LF_L	9	9	9	17	17	17	87.22	0	60.928	2004700000	51	2.73372	0.00253784	1.10662	5.29068	25.8466	25.5682	25.8933	26.125	25.9874	25.5118	25.746	25.4283	25.3978	25.0505	24.7352	25.4344	25.9633	26.1662	26.3434	26.5715
+	2.75065	2.31124	Q8CIH5	Q8CIH5	1-phosphatidylinositol 4,5-bisphosphate phosphodiesterase gamma-2	Plcg2	Q8CIH5	Color2 [A=255, R=169, G=169, B=169]	1	4					+	LF_L	19	19	19	23	23	23	147.59	0	156.96	4637800000	88	2.75065	0.00241436	2.31124	5.33149	26.8908	27.3758	27.2811	27.151	27.2474	26.5445	26.9204	26.8813	24.3534	24.069	23.8411	25.6443	26.545	26.5281	26.877	27.2026
+	2.54476	1.05748	A0A1C7CYV0;Q3UJG9;B1AX58;Q99K51;Q3UKB1	A0A1C7CYV0;Q3UJG9;B1AX58;Q99K51;Q3UKB1	Plastin-3	Pls3	A0A1C7CYV0;Q3UJG9;B1AX58;Q99K51;Q3UKB1	Color2 [A=255, R=169, G=169, B=169]	1	4					+	LF_L	16	11	9	33.9	25.8	21.6	70.642	0	41.863	2893700000	48	2.54476	0.0031922	1.05748	4.84967	24.8474	25.2577	25.3895	26.0106	25.4674	24.0689	25.0705	25.8219	25.9394	25.9736	26.109	26.1551	26.7717	27.485	26.7004	27.4499
+	4.04068	1.1888	Q61074;A0A0J9YVG0;A0A0J9YV96;A0A0J9YUB0	Q61074;A0A0J9YVG0	Protein phosphatase 1G	Ppm1g	Q61074;A0A0J9YVG0	Color2 [A=255, R=169, G=169, B=169]	1	4					+	LF_L	11	11	11	37.3	37.3	37.3	58.727	0	115.32	6248800000	110	4.04068	0	1.1888	9.23422	26.8953	27.3064	27.0784	27.3245	26.9563	26.7848	27.06	26.79	25.2923	25.2596	25.7249	25.3781	26.5327	26.4798	26.5898	26.8078
+	2.99972	2.34927	Q3TT94;Q6P1F6;Q3TPC5;Q571J7;Q9CWU3;Q7TPQ7;Q925E7;F6RV17;Q8BVB4;A0A668KLA9;Q6ZWR4;A0A286YDJ9;A0A494B941;G3UXS9;A0A494B8Z0;Q8BG02	Q3TT94;Q6P1F6;Q3TPC5;Q571J7;Q9CWU3;Q7TPQ7	Serine/threonine-protein phosphatase 2A 55 kDa regulatory subunit B;Serine/threonine-protein phosphatase 2A 55 kDa regulatory subunit B alpha isoform	Ppp2r2a	Q3TT94;Q6P1F6;Q3TPC5;Q571J7;Q9CWU3;Q7TPQ7	Color2 [A=255, R=169, G=169, B=169]	1	4					+	LF_L	12	12	11	41.4	41.4	36.7	51.691	0	62.732	4475900000	71	2.99972	0.00116129	2.34927	5.95807	26.6656	27.1315	26.7434	27.2543	27.1476	26.603	26.5519	27.2471	24.1193	25.9656	25.2292	25.2344	27.1988	27.609	27.6524	27.4853
+	2.43645	1.31332	Q8C0E1;Q543N6;P58389;A2AWE9;A2AWF0;D6RFC2;B7ZDE0	Q8C0E1;Q543N6;P58389	Serine/threonine-protein phosphatase 2A activator	Ppp2r4	Q8C0E1;Q543N6;P58389	Color2 [A=255, R=169, G=169, B=169]	1	4					+	LF_L	7	7	7	28.2	28.2	28.2	36.755	0	71.893	2532100000	41	2.43645	0.00393814	1.31332	4.60814	26.3257	27.2551	26.4328	27.0729	26.7239	26.3958	26.7489	26.6446	25.3198	24.8983	24.6687	24.832	25.5971	26.1499	26.4626	26.7624
+	1.73334	1.41556	Q9DBC7;Q3UBA7;Q8C3Z4;Q3TYK4;Q9CS50;A2AI69;F8S0Y0	Q9DBC7;Q3UBA7;Q8C3Z4;Q3TYK4;Q9CS50	cAMP-dependent protein kinase type I-alpha regulatory subunit;cAMP-dependent protein kinase type I-alpha regulatory subunit, N-terminally processed	Prkar1a	Q9DBC7;Q3UBA7;Q8C3Z4;Q3TYK4;Q9CS50	Color2 [A=255, R=169, G=169, B=169]	1	4					+	LF_L	7	7	7	20.5	20.5	20.5	43.185	0	60.78	4749300000	57	1.73334	0.0159301	1.41556	3.20521	27.0666	27.5695	26.355	28.0207	27.6575	27.2662	27.6409	27.3264	25.9178	25.8586	25.7062	26.886	27.7146	27.8651	26.4683	27.9827
+	2.69655	1.41341	Q8CIG8;A0A0R4J049;F6QQQ6	Q8CIG8;A0A0R4J049	Protein arginine N-methyltransferase 5	Prmt5	Q8CIG8;A0A0R4J049	Color2 [A=255, R=169, G=169, B=169]	1	4					+	LF_L	10	10	10	27.9	27.9	27.9	72.679	0	42.291	3674400000	58	2.69655	0.00270219	1.41341	5.88608	26.8307	26.9575	26.9768	27.013	26.6491	26.5622	26.4796	26.6253	25.3147	25.4735	25.8244	NaN	26.4901	27.2659	26.8896	27.1581
+	1.87728	1.14107	Q3UYN1;Q544R1;A0A1B0GRP7;Q9Z2Y8;A0A1B0GRR5;Q6P8V7;A0A1B0GSA1;A0A1B0GSP5;A0A1B0GQY5;Q80ZV3	Q3UYN1;Q544R1;A0A1B0GRP7;Q9Z2Y8;A0A1B0GRR5;Q6P8V7	Proline synthase co-transcribed bacterial homolog protein	Prosc	Q3UYN1;Q544R1;A0A1B0GRP7;Q9Z2Y8;A0A1B0GRR5;Q6P8V7	Color2 [A=255, R=169, G=169, B=169]	1	4					+	LF_L	4	4	4	22.1	22.1	22.1	35.873	0	27.043	1286200000	20	1.87728	0.0117021	1.14107	4.23982	25.7899	25.6711	25.7816	26.216	25.7724	25.188	25.9254	25.4964	NaN	24.5833	25.4077	NaN	26.2793	25.9991	26.074	26.1939
+	1.55946	1.07523	B2RT97;Q9WVJ2;E9Q5I9;E9Q0U1;F6PXS6;F6ZQQ3;E9PY93	B2RT97;Q9WVJ2;E9Q5I9;E9Q0U1	26S proteasome non-ATPase regulatory subunit 13	Psmd13	B2RT97;Q9WVJ2;E9Q5I9;E9Q0U1	Color2 [A=255, R=169, G=169, B=169]	1	4					+	LF_L	14	14	14	42.8	42.8	42.8	42.809	0	76.919	10896000000	109	1.55946	0.0219756	1.07523	2.89325	27.7758	27.9599	27.7831	27.986	28.019	27.3693	27.8297	27.8574	27.4509	27.3363	25.9544	27.5029	28.0733	28.112	28.1542	28.206
+	2.19683	1.50974	Q8BJY1;Q921U5;F7BA91	Q8BJY1;Q921U5	26S proteasome non-ATPase regulatory subunit 5	Psmd5	Q8BJY1;Q921U5	Color2 [A=255, R=169, G=169, B=169]	1	4					+	LF_L	10	10	10	27.2	27.2	27.2	55.971	0	74.153	4197500000	53	2.19683	0.00742857	1.50974	4.10022	26.1426	26.9463	26.4815	26.6174	26.8853	26.3239	26.5459	26.7506	25.6529	24.4996	24.5523	25.7305	26.3173	26.4551	26.7131	26.9888
+	1.37708	1.134	Q99LS3;A0A0J9YVH9;D3Z4T3;D3Z666	Q99LS3;A0A0J9YVH9	Phosphoserine phosphatase	Psph	Q99LS3;A0A0J9YVH9	Color2 [A=255, R=169, G=169, B=169]	1	4					+	LF_L	7	7	7	46.2	46.2	46.2	25.096	0	44.664	2695400000	52	1.37708	0.0329862	1.134	2.71613	27.0833	27.0134	26.9046	26.9482	26.8585	26.6302	26.7868	26.1161	25.9695	24.7652	26.3293	25.9954	NaN	27.1315	26.7858	26.7792
+	2.78097	1.08544	Q3U6F1;E9Q7W0;Q3UM17;A0A0J9YTV5;P31266;A0A0J9YVE0;Q3V2I2;O08674	Q3U6F1;E9Q7W0;Q3UM17;A0A0J9YTV5;P31266	Recombining binding protein suppressor of hairless	Rbpj	Q3U6F1;E9Q7W0;Q3UM17;A0A0J9YTV5;P31266	Color2 [A=255, R=169, G=169, B=169]	1	4					+	LF_L	5	5	5	15.3	15.3	15.3	51.926	0	19.836	1640800000	28	2.78097	0.00231261	1.08544	5.40511	24.5872	NaN	24.0879	NaN	25.2617	NaN	24.116	25.6668	26.0696	25.4272	25.8468	25.9661	26.8307	27.3304	26.8092	26.6811
+	1.72641	1.05851	Q62159;H3BL56;A0A0G2JEP8	Q62159;H3BL56;A0A0G2JEP8	Rho-related GTP-binding protein RhoC	Rhoc	Q62159;H3BL56;A0A0G2JEP8	Color2 [A=255, R=169, G=169, B=169]	1	4					+	LF_L	10	2	2	65.8	18.7	18.7	22.006	0	6.755	634130000	8	1.72641	0.0160298	1.05851	3.82016	NaN	NaN	NaN	NaN	NaN	NaN	NaN	NaN	26.1208	NaN	25.7653	25.2807	NaN	26.5563	27.0142	26.7717
+	3.0166	1.61633	Q8VCT3;Q8BMH2;E9PYF1	Q8VCT3;Q8BMH2;E9PYF1	Aminopeptidase B	Rnpep	Q8VCT3;Q8BMH2;E9PYF1	Color2 [A=255, R=169, G=169, B=169]	1	4					+	LF_L	10	10	10	21.4	21.4	21.4	72.415	0	51.152	2538600000	65	3.0166	0.000954733	1.61633	6.00242	25.4725	26.0792	25.7921	26.2038	26.0853	25.3954	25.7011	25.3005	24.9946	24.7671	24.0359	23.9858	25.8325	26.1003	26.2403	26.0757
+	3.6033	1.06787	A0A0G2JGD2;Q545V2;P07091	A0A0G2JGD2;Q545V2;P07091	Protein S100;Protein S100-A4	S100a4	A0A0G2JGD2;Q545V2;P07091	Color2 [A=255, R=169, G=169, B=169]	1	4					+	LF_L	5	5	5	50	50	50	9.0621	0	30.593	221520000000	96	3.6033	0	1.06787	7.71168	33.7888	34.1909	33.7095	33.9299	33.7946	33.3946	33.7544	33.4315	32.3323	32.3027	32.0942	32.2789	32.9442	33.383	33.5037	33.4486
+	4.65443	2.77819	Q9R1T2	Q9R1T2	SUMO-activating enzyme subunit 1;SUMO-activating enzyme subunit 1, N-terminally processed	Sae1	Q9R1T2	Color2 [A=255, R=169, G=169, B=169]	1	4					+	LF_L	12	12	11	55.4	55.4	47.4	38.62	0	119.07	4748000000	76	4.65443	0	2.77819	15.2256	26.9784	27.3611	26.893	27.333	27.2967	26.2399	27.0671	26.9056	23.915	NaN	23.3145	23.6953	26.1463	26.4846	26.5265	26.5217
+	2.94841	1.13281	A0AUN0;Q4G0C0;G3X928;Q6NZC7;Q3UY74	A0AUN0;Q4G0C0;G3X928;Q6NZC7;Q3UY74	SEC23-interacting protein	Sec23ip	A0AUN0;Q4G0C0;G3X928;Q6NZC7;Q3UY74	Color2 [A=255, R=169, G=169, B=169]	1	4					+	LF_L	6	6	6	11	11	11	95.116	0	35.235	1606700000	47	2.94841	0.00151145	1.13281	5.82482	25.5069	25.1412	24.6383	25.1218	25.4926	25.32	25.3534	25.1503	24.5962	25.0106	24.9034	25.1979	25.719	25.9909	26.436	26.0935
+	3.74169	3.36228	Q3UPL0;S4R2A9;S4R192;S4R256;Q9CVL3;S4R1T5;Q05DS7	Q3UPL0;S4R2A9	Protein transport protein Sec31A	Sec31a	Q3UPL0;S4R2A9	Color2 [A=255, R=169, G=169, B=169]	1	4					+	LF_L	15	15	15	21.7	21.7	21.7	133.57	0	84.462	3947100000	77	3.74169	0	3.36228	8.16806	26.8825	27.1445	25.8035	26.1968	27.4434	26.9778	26.1772	26.8754	24.2656	23.4775	22.5544	24.2342	26.9407	26.8029	27.0354	27.2018
+	2.26262	1.54042	P42208;E9Q3V6;F6WYM0;D3YYB1;D3Z3C0;D3Z1S1;F6UKN5;D3YZU7;D3YV76;G3UYQ0	P42208;E9Q3V6;F6WYM0;D3YYB1;D3Z3C0	Septin-2	Sept2	P42208;E9Q3V6;F6WYM0;D3YYB1;D3Z3C0	Color2 [A=255, R=169, G=169, B=169]	1	4					+	LF_L	10	10	10	43.2	43.2	43.2	41.525	0	74.853	9429700000	81	2.26262	0.00602985	1.54042	4.23625	27.5105	27.7141	27.1945	27.6579	27.5413	27.0269	27.5225	27.2869	26.4872	25.1067	26.5479	26.4819	27.4668	27.6944	27.9475	27.6765
+	2.15476	1.59179	Q3TDR9;A2A6U3;Q80UG5;A2A6U5;A8Y5D3	Q3TDR9;A2A6U3;Q80UG5;A2A6U5	Septin-9	Sept9	Q3TDR9;A2A6U3;Q80UG5;A2A6U5	Color2 [A=255, R=169, G=169, B=169]	1	4					+	LF_L	9	9	9	33.8	33.8	33.8	38.6	0	34.089	3478400000	53	2.15476	0.00767742	1.59179	4.01453	25.19	26.3641	26.0584	26.8713	26.7823	26.0255	26.2938	25.9955	25.648	23.9832	24.6632	25.4997	26.421	26.7717	26.5407	26.4279
+	3.06688	1.13514	Q542C8;Q3TN05;Q9WTR6;A0A0B4J1P7;Q8BYV9	Q542C8;Q3TN05;Q9WTR6;A0A0B4J1P7;Q8BYV9	Cystine/glutamate transporter	Slc7a11	Q542C8;Q3TN05;Q9WTR6;A0A0B4J1P7;Q8BYV9	Color2 [A=255, R=169, G=169, B=169]	1	4					+	LF_L	4	4	4	10.8	10.8	10.8	55.455	0	56.637	2477300000	34	3.06688	0.000659529	1.13514	6.13596	NaN	24.6082	NaN	NaN	23.9733	24.6036	23.981	24.0698	26.2745	26.2989	26.3791	26.6508	27.5812	27.6544	27.072	27.8361
+	1.83993	1.46893	Q6NZD2;Q3U4S1;Q3TI63;Q9WV80;Q3UDY9;D3YWH1	Q6NZD2;Q3U4S1;Q3TI63;Q9WV80;Q3UDY9	Sorting nexin-1	Snx1	Q6NZD2;Q3U4S1;Q3TI63;Q9WV80;Q3UDY9	Color2 [A=255, R=169, G=169, B=169]	1	4					+	LF_L	12	10	10	26.9	22.8	22.8	58.878	0	63.07	4804500000	58	1.83993	0.0124464	1.46893	3.4022	27.0309	27.4728	26.7004	27.3355	27.4228	26.7995	26.4892	27.1654	26.5456	24.8861	25.7651	26.4834	27.5585	27.8459	27.1041	27.0475
+	1.85135	1.52665	Q3TJN6;Q9D8U8;Q8C5E7;Q3TXT4	Q3TJN6;Q9D8U8;Q8C5E7;Q3TXT4	Sorting nexin-5	Snx5	Q3TJN6;Q9D8U8;Q8C5E7;Q3TXT4	Color2 [A=255, R=169, G=169, B=169]	1	4					+	LF_L	17	17	17	40.8	40.8	40.8	46.798	0	47.071	8278400000	89	1.85135	0.012325	1.52665	3.42358	27.2794	27.6276	27.3145	27.7753	27.6494	27.0268	27.1191	27.1819	26.5151	25.9261	24.6139	26.3153	27.0461	27.37	27.6671	27.3936
+	3.69064	1.02556	Q3U1P2;Q3TZU7;Q91VH2;Q9CZK0	Q3U1P2;Q3TZU7;Q91VH2;Q9CZK0	Sorting nexin;Sorting nexin-9	Snx9	Q3U1P2;Q3TZU7;Q91VH2;Q9CZK0	Color2 [A=255, R=169, G=169, B=169]	1	4					+	LF_L	9	9	9	27.1	27.1	27.1	66.545	0	67.384	5001300000	70	3.69064	0	1.02556	7.99712	27.3128	27.2813	27.2856	27.4913	27.2978	27.0712	27.2425	27.1183	26.4809	26.3911	26.6404	26.111	27.5448	27.3109	27.3298	27.5401
+	3.71288	1.47338	A2AQU8;Q9D975	A2AQU8;Q9D975	Sulfiredoxin-1	Srxn1	A2AQU8;Q9D975	Color2 [A=255, R=169, G=169, B=169]	1	4					+	LF_L	3	3	3	31.6	31.6	31.6	16.063	0	18.793	1749600000	32	3.71288	0	1.47338	8.07121	23.9063	NaN	24.4623	NaN	25.3096	25.6475	25.0014	25.3211	25.4627	25.7494	25.4535	25.1777	26.5316	27.1778	27.048	26.9795
+	1.81351	1.04242	Q9JI11;A2A5M9;F7BYZ4	Q9JI11	Serine/threonine-protein kinase 4;Serine/threonine-protein kinase 4 37kDa subunit;Serine/threonine-protein kinase 4 18kDa subunit	Stk4	Q9JI11	Color2 [A=255, R=169, G=169, B=169]	1	4					+	LF_L	8	8	4	19.5	19.5	9.4	55.541	0	15.07	524740000	24	1.81351	0.0130653	1.04242	3.61104	24.3465	24.9447	NaN	24.7384	24.9699	24.3188	24.3894	24.5406	23.9612	23.8318	NaN	23.7882	24.6393	24.5898	24.7641	25.618
+	3.94946	1.0588	A0A1B0GR11;Q93092	A0A1B0GR11;Q93092	Transaldolase	Taldo1	A0A1B0GR11;Q93092	Color2 [A=255, R=169, G=169, B=169]	1	4					+	LF_L	15	15	15	34.6	34.6	34.6	42.151	0	47.758	54208000000	204	3.94946	0	1.0588	8.89675	29.8102	30.0153	30.0099	29.9807	30.2938	29.8465	29.9153	30.0415	28.8759	28.5532	29.0435	28.8128	29.7007	29.9174	29.9198	29.9826
+	2.70999	1.00603	A0A1Y7VJ48;Q5I0U7;P48428	A0A1Y7VJ48;Q5I0U7;P48428	Tubulin-specific chaperone A	Tbca	A0A1Y7VJ48;Q5I0U7;P48428	Color2 [A=255, R=169, G=169, B=169]	1	4					+	LF_L	6	6	5	60.7	60.7	51.2	9.9271	0	24.678	7958200000	43	2.70999	0.00273217	1.00603	5.23386	27.9734	28.2995	28.2648	28.3044	28.0235	27.6136	27.6861	27.8059	26.931	26.4212	27.0059	27.1823	27.6216	27.8601	27.9949	28.0879
+	1.89314	1.49021	Q8C1A5;A0A0R4IZY0;Q99LK5	Q8C1A5;A0A0R4IZY0	Thimet oligopeptidase	Thop1	Q8C1A5;A0A0R4IZY0	Color2 [A=255, R=169, G=169, B=169]	1	4					+	LF_L	10	10	10	19.1	19.1	19.1	78.025	0	80.97	3177000000	63	1.89314	0.0112477	1.49021	3.50236	26.2094	26.4915	26.4149	26.7523	26.6568	26.1253	26.2349	25.8673	25.3984	23.9708	24.2345	25.5095	26.4294	26.5118	25.803	26.33
+	4.83668	1.00025	P17751;H7BXC3	P17751;H7BXC3	Triosephosphate isomerase	Tpi1	P17751;H7BXC3	Color2 [A=255, R=169, G=169, B=169]	1	4					+	LF_L	15	15	15	77.9	77.9	77.9	26.712	0	188.98	122980000000	245	4.83668	0	1.00025	12.7076	31.1119	31.3514	31.0467	31.2254	31.1947	30.7731	30.8333	31.003	30.2276	30.0042	30.2323	30.2443	31.0209	31.2184	31.2074	31.2627
+	1.85354	1.23033	Q545E6;Q62348	Q545E6;Q62348	Translin	Tsn	Q545E6;Q62348	Color2 [A=255, R=169, G=169, B=169]	1	4					+	LF_L	4	4	4	27.2	27.2	27.2	26.201	0	33.075	4240000000	48	1.85354	0.0122724	1.23033	3.42769	27.5066	27.5149	27.218	27.4536	27.3004	26.7511	27.038	27.0825	25.8204	24.8579	26.1687	26.4704	26.8301	27.0856	27.13	27.1931
+	3.66579	1.15098	Q8BVK3;Q3TW96	Q8BVK3;Q3TW96	UDP-N-acetylhexosamine pyrophosphorylase-like protein 1	Uap1l1	Q8BVK3;Q3TW96	Color2 [A=255, R=169, G=169, B=169]	1	4					+	LF_L	8	8	8	20.2	20.2	20.2	56.872	0	44.486	6116700000	84	3.66579	0	1.15098	7.915	26.7828	27.1674	26.7294	26.9085	26.8306	26.5141	26.7347	26.8609	25.4351	25.4717	25.1735	25.035	26.1472	26.517	26.4407	26.6143
+	2.47649	1.067	Q9Z1F9;H3BLM2;H3BLR3;A2BH29;H3BJQ2	Q9Z1F9	SUMO-activating enzyme subunit 2	Uba2	Q9Z1F9	Color2 [A=255, R=169, G=169, B=169]	1	4					+	LF_L	15	15	14	36.2	36.2	33.7	70.568	0	56.901	7920000000	93	2.47649	0.00352064	1.067	4.69651	27.2432	27.487	27.5181	27.6132	27.286	27.0656	27.2041	27.2891	26.0219	26.0651	25.3536	26.1198	26.6091	26.8933	27.0611	27.265
+	2.0301	1.86856	Q8C7R4;D3Z061	Q8C7R4;D3Z061	Ubiquitin-like modifier-activating enzyme 6	Uba6	Q8C7R4;D3Z061	Color2 [A=255, R=169, G=169, B=169]	1	4					+	LF_L	14	14	14	17.5	17.5	17.5	117.96	0	62.097	2176700000	66	2.0301	0.00923781	1.86856	3.76619	25.6606	25.7356	25.1404	26.2447	25.6156	25.1783	24.6711	25.2505	25.099	25.2432	23.2121	24.5948	25.9967	26.8658	26.3946	26.3662
+	3.86334	1.17442	Q8R0M2;Q3U548;Q91ZJ5	Q8R0M2;Q3U548;Q91ZJ5	UTP--glucose-1-phosphate uridylyltransferase	Ugp2	Q8R0M2;Q3U548;Q91ZJ5	Color2 [A=255, R=169, G=169, B=169]	1	4					+	LF_L	4	4	4	12.1	12.1	12.1	55.497	0	6.9891	447060000	15	3.86334	0	1.17442	14.3513	NaN	25.0539	NaN	25.2368	25.2275	24.8471	24.9244	24.8271	24.1408	NaN	23.8794	NaN	25.183	25.1875	25.156	25.2116
+	4.38764	1.4537	Q3U4W8;P56399;D3YYA5;D3Z4K7	Q3U4W8;P56399	Ubiquitin carboxyl-terminal hydrolase;Ubiquitin carboxyl-terminal hydrolase 5	Usp5	Q3U4W8;P56399	Color2 [A=255, R=169, G=169, B=169]	1	4					+	LF_L	20	20	20	31.3	31.3	31.3	93.354	0	87.334	8799300000	138	4.38764	0	1.4537	10.6246	26.8949	27.2501	26.8708	27.2849	27.0433	26.6517	26.8374	26.7598	25.4304	24.9517	25.4286	25.4897	26.6828	26.8969	26.6874	26.848
+	2.76202	1.06988	Q8VDU4;Q3UAV5;E9PXI0;Q3U9E2;Q3U8U1;Q3U670;Q3U4K7;Q3TXC4;P27870;Q3UAH3;Q3UAG9;Q3V0U7;O08526	Q8VDU4;Q3UAV5;E9PXI0;Q3U9E2;Q3U8U1;Q3U670;Q3U4K7;Q3TXC4;P27870;Q3UAH3;Q3UAG9	Proto-oncogene vav	Vav1	Q8VDU4;Q3UAV5;E9PXI0;Q3U9E2;Q3U8U1;Q3U670;Q3U4K7;Q3TXC4;P27870;Q3UAH3;Q3UAG9	Color2 [A=255, R=169, G=169, B=169]	1	4					+	LF_L	7	7	6	11.8	11.8	10.5	93.868	0	42.384	1080700000	40	2.76202	0.00235644	1.06988	6.08781	23.9463	25.2677	24.4961	24.9785	25.3776	24.8646	24.9392	25.5509	24.3766	NaN	23.9596	24.344	24.9634	25.3655	25.3719	25.4856
+	2.85358	2.27419	Q64727;A0A286YDJ4	Q64727	Vinculin	Vcl	Q64727	Color2 [A=255, R=169, G=169, B=169]	1	4					+	LF_L	22	22	21	34	34	32.8	116.72	0	95.689	4152100000	86	2.85358	0.00176596	2.27419	5.58433	26.085	26.5533	25.8734	26.6259	26.6024	25.8806	26.3142	26.4234	24.8436	23.3956	25.0634	24.7649	26.3904	26.7425	27.0478	26.9836
+	3.56005	1.13846	Q3TRJ1;Q3TJ43;Q9EQH3;Q3TKU6;Q3UQJ1;Q3TUV7	Q3TRJ1;Q3TJ43;Q9EQH3;Q3TKU6;Q3UQJ1	Vacuolar protein sorting-associated protein 35	Vps35	Q3TRJ1;Q3TJ43;Q9EQH3;Q3TKU6;Q3UQJ1	Color2 [A=255, R=169, G=169, B=169]	1	4					+	LF_L	13	13	13	21.5	21.5	21.5	91.712	0	104.86	10847000000	135	3.56005	0	1.13846	7.57354	27.5416	27.8605	27.6195	27.6459	27.6213	27.1615	27.3966	27.4169	26.0624	26.5792	26.5849	26.3421	27.3009	27.5007	27.646	27.6749
+	3.59525	1.75818	Q3U6U7;Q3UDG2;Q4FJZ4;P32921;E0CXX4;E0CXQ4	Q3U6U7;Q3UDG2;Q4FJZ4;P32921	Tryptophan--tRNA ligase, cytoplasmic;T1-TrpRS;T2-TrpRS	Wars	Q3U6U7;Q3UDG2;Q4FJZ4;P32921	Color2 [A=255, R=169, G=169, B=169]	1	4					+	LF_L	13	13	13	41.9	41.9	41.9	53.64	0	110.68	5187000000	66	3.59525	0	1.75818	7.6858	27.0779	27.4343	26.9885	27.5498	27.5082	26.9979	26.6595	27.0099	25.0956	25.2539	25.8912	25.7358	26.9479	27.435	27.4891	27.1372
+	2.37235	1.3476	Q3UE92;Q3UKF5;Q6P1B1;S4R1I3;A0A494BBG8;Q3TL27;Q8VDK8;Q8BV43;Q8BKH1;S4R228	Q3UE92;Q3UKF5;Q6P1B1;S4R1I3;A0A494BBG8;Q3TL27;Q8VDK8;Q8BV43;Q8BKH1	Xaa-Pro aminopeptidase 1	Xpnpep1	Q3UE92;Q3UKF5;Q6P1B1;S4R1I3;A0A494BBG8;Q3TL27;Q8VDK8;Q8BV43;Q8BKH1	Color2 [A=255, R=169, G=169, B=169]	1	4					+	LF_L	13	13	12	28.7	28.7	26.9	74.559	0	73.486	4398900000	62	2.37235	0.00467164	1.3476	4.46882	26.7283	27.0957	26.5133	26.8368	27.1098	26.2514	26.4768	26.8719	24.9819	24.9434	25.7988	26.0385	26.49	26.9408	26.7492	26.973
+	2.84765	1.61692	Q9CRT8;A0A1W2P7Q6;A0A1W2P7V1	Q9CRT8;A0A1W2P7Q6	Exportin-T	Xpot	Q9CRT8;A0A1W2P7Q6	Color2 [A=255, R=169, G=169, B=169]	1	4					+	LF_L	6	6	6	7	7	7	109.73	0	24.296	1067100000	33	2.84765	0.00175661	1.61692	7.85354	25.4851	25.6533	24.9906	25.821	26.1217	23.8874	24.737	24.7185	22.4579	NaN	22.8234	NaN	24.3092	24.4583	23.9259	24.3368

## Sheet: Down-regulated
Significant	‘=-Log10(P-value)	log2FC	Protein IDs	Majority protein IDs	Protein names	Gene names	Fasta headers	Symbol color	Symbol type	Symbol size	Show label	Only identified by site	Reverse	Potential contaminant	Student's T-test Significant LF_L	Student's T-test significant	Peptides	Razor + unique peptides	Unique peptides	Sequence coverage [%]	Unique + razor sequence coverage [%]	Unique sequence coverage [%]	Mol. weight [kDa]	Q-value	Score	Intensity	MS/MS count	-Log Student's T-test p-value LF_L	Student's T-test q-value LF_L	Student's T-test Difference LF_L	Student's T-test Test statistic LF_L	LFQ intensity BC1	LFQ intensity BC2	LFQ intensity BC3	LFQ intensity BC4	LFQ intensity F1	LFQ intensity F2	LFQ intensity F3	LFQ intensity F4	LFQ intensity L1	LFQ intensity L2	LFQ intensity L3	LFQ intensity L4	LFQ intensity LF1	LFQ intensity LF2	LFQ intensity LF3	LFQ intensity LF4
+	3.18487	-1.61182	Q3U6F9;Q5QNW0;P10855	Q3U6F9;Q5QNW0;P10855	C-C motif chemokine;C-C motif chemokine 3	Ccl3	Q3U6F9;Q5QNW0;P10855	Color2 [A=255, R=169, G=169, B=169]	1	4					+	LF_L	2	2	2	51.4	51.4	51.4	8.4485	0	71.28	10659000000	21	3.18487	0.000340426	-1.61182	-6.45824	NaN	NaN	NaN	NaN	NaN	NaN	NaN	NaN	30.3202	30.7748	30.3767	29.9905	28.3057	28.9789	29.1488	28.5815
+	2.81329	-1.66326	Q5QNV9;P14097	Q5QNV9;P14097	C-C motif chemokine;C-C motif chemokine 4	Ccl4	Q5QNV9;P14097	Color2 [A=255, R=169, G=169, B=169]	1	4					+	LF_L	1	1	1	22.8	22.8	22.8	10.168	0	10.473	1177200000	12	2.81329	0.00218244	-1.66326	-5.48436	NaN	NaN	NaN	NaN	NaN	NaN	NaN	NaN	27.1758	27.3313	26.8596	27.3827	24.857	26.1003	25.8488	25.2901
+	1.37958	-1.03943	Q5XZF2;P30882	Q5XZF2;P30882	C-C motif chemokine;C-C motif chemokine 5	Ccl5	Q5XZF2;P30882	Color2 [A=255, R=169, G=169, B=169]	1	4					+	LF_L	4	4	4	35.2	35.2	35.2	10.071	0	8.1506	2270900000	13	1.37958	0.0328993	-1.03943	-2.58074	NaN	NaN	NaN	NaN	NaN	NaN	NaN	NaN	27.4379	28.6097	27.7973	26.833	26.6926	27.0313	26.4998	26.2966
+	1.44555	-1.06629	Q80TU6;F6RJ39;Q52KR6;Q3UXT9;F6Q8C0;B8JJ89;B8JJ90	Q80TU6;F6RJ39;Q52KR6		Acin1	Q80TU6;F6RJ39;Q52KR6	Color2 [A=255, R=169, G=169, B=169]	1	4					+	LF_L	17	17	3	19.8	19.8	5.1	142.85	0	111.69	11445000000	161	1.44555	0.0284249	-1.06629	-2.6943	27.4776	27.2213	27.3227	27.4062	27.3197	27.5163	27.4141	27.3791	27.5969	27.7414	27.9563	27.6438	27.2001	27.1607	25.5425	26.7699
+	2.96346	-1.00585	Q8BP40	Q8BP40	Lysophosphatidic acid phosphatase type 6	Acp6	Q8BP40	Color2 [A=255, R=169, G=169, B=169]	1	4					+	LF_L	4	4	4	15.8	15.8	15.8	47.624	0	26.7	1632700000	26	2.96346	0.00153786	-1.00585	-5.86367	25.8643	26.2262	25.9991	26.1854	25.901	25.8411	25.7281	25.9246	26.3678	26.6602	26.7584	26.7385	26.0037	25.6137	25.2925	25.5916
+	1.83876	-1.49726	Q9WTP6;F7BP55	Q9WTP6	Adenylate kinase 2, mitochondrial;Adenylate kinase 2, mitochondrial, N-terminally processed	Ak2	Q9WTP6	Color2 [A=255, R=169, G=169, B=169]	1	4					+	LF_L	11	11	11	57.7	57.7	57.7	26.468	0	58.154	7744900000	77	1.83876	0.0125097	-1.49726	-3.40002	27.2068	26.9884	27.0657	26.8721	26.8134	26.9255	26.9061	26.0626	27.718	28.0965	28.1136	28.0302	25.2293	27.0444	26.6577	27.0379
+	2.44739	-1.65467	Q6P1H6	Q6P1H6	Ankyrin repeat and LEM domain-containing protein 2	Ankle2	Q6P1H6	Color2 [A=255, R=169, G=169, B=169]	1	4					+	LF_L	10	10	10	17	17	17	106.2	0	74.355	2438500000	47	2.44739	0.00386476	-1.65467	-4.63219	27.1623	25.8301	25.5419	26.0257	25.8942	26.5657	26.0788	25.7493	27.4485	26.9867	27.6153	27.6978	25.2783	25.2062	26.4939	26.1513
+	2.11432	-1.24682	Q8CH18;A0A1W2P765;A0A1W2P7Q7	Q8CH18	Cell division cycle and apoptosis regulator protein 1	Ccar1	Q8CH18	Color2 [A=255, R=169, G=169, B=169]	1	4					+	LF_L	14	14	14	16.5	16.5	16.5	132.06	0	41.566	5100400000	84	2.11432	0.0081089	-1.24682	-3.93307	26.2274	25.993	25.7369	25.964	25.7268	25.8639	25.968	25.9452	26.7613	26.9781	27.1917	26.7441	25.8648	26.096	25.9404	24.7868
+	4.02906	-1.19093	Q9JJ89	Q9JJ89	Coiled-coil domain-containing protein 86	Ccdc86	Q9JJ89	Color2 [A=255, R=169, G=169, B=169]	1	4					+	LF_L	3	3	3	9.4	9.4	9.4	46.486	0	5.0303	657550000	18	4.02906	0	-1.19093	-15.8099	25.323	25.4652	25.2101	25.4119	NaN	25.3569	24.9553	25.1829	25.5892	25.4608	25.4727	25.6715	NaN	24.3535	24.3618	NaN
+	1.67216	-1.51337	A0A0R4J2B0;V9GX43;S4R2U7;S4R1S7;E9QA47;Q9Z0H4;S4R2L5;S4R2J2;A3KGT0;S4R2S7;S4R2U1	A0A0R4J2B0;V9GX43;S4R2U7;S4R1S7;E9QA47;Q9Z0H4;S4R2L5;S4R2J2;A3KGT0	CUGBP Elav-like family member 2	Celf2	A0A0R4J2B0;V9GX43;S4R2U7;S4R1S7;E9QA47;Q9Z0H4;S4R2L5;S4R2J2;A3KGT0	Color2 [A=255, R=169, G=169, B=169]	1	4					+	LF_L	8	8	7	23.4	23.4	21.1	46.607	0	39.427	4341700000	63	1.67216	0.0178686	-1.51337	-3.0942	27.238	27.2457	26.9313	27.0511	27.3984	27.0685	27.3367	26.8003	26.8131	26.7889	26.8503	26.7201	24.7462	24.189	26.2765	25.9072
+	3.35454	-1.2458	B7ZMS6;E9PW20;Q2VPR3;Q9CY57;D3YZA1;D3Z7T7	B7ZMS6;E9PW20;Q2VPR3;Q9CY57;D3YZA1;D3Z7T7	Chromatin target of PRMT1 protein	Chtop	B7ZMS6;E9PW20;Q2VPR3;Q9CY57;D3YZA1;D3Z7T7	Color2 [A=255, R=169, G=169, B=169]	1	4					+	LF_L	5	5	5	39.3	39.3	39.3	19.371	0	90.782	18207000000	100	3.35454	0	-1.2458	-6.94484	27.7948	27.847	28.3532	27.8555	27.905	28.2387	28.0604	28.1016	29.0892	28.8741	28.6873	28.895	27.2275	27.8919	27.5509	27.8921
+	3.33911	-1.09437	Q3UJY3;Q8R2N2	Q3UJY3;Q8R2N2	Cirhin	Cirh1a	Q3UJY3;Q8R2N2	Color2 [A=255, R=169, G=169, B=169]	1	4					+	LF_L	9	9	9	17.2	17.2	17.2	76.885	0	109.09	4618200000	66	3.33911	0	-1.09437	-6.89943	27.1584	26.772	26.7356	26.5502	26.5932	26.5601	26.8286	26.7275	26.9136	27.3047	27.1628	26.7075	26.1842	25.7913	25.8652	25.8705
+	2.46094	-1.15967	Q99LC2;A2APA3	Q99LC2	Cleavage stimulation factor subunit 1	Cstf1	Q99LC2	Color2 [A=255, R=169, G=169, B=169]	1	4					+	LF_L	8	8	8	29	29	29	48.381	0	54.138	2163500000	43	2.46094	0.0036549	-1.15967	-4.66206	25.5734	25.9942	25.2323	25.2285	25.2326	25.31	25.1312	24.8964	26.4704	26.511	26.4363	26.4422	25.7678	25.4102	25.4418	24.6014
+	5.59074	-1.00962	Q8K0C4;Q9CW87	Q8K0C4	Lanosterol 14-alpha demethylase	Cyp51a1	Q8K0C4	Color2 [A=255, R=169, G=169, B=169]	1	4					+	LF_L	17	17	17	47.9	47.9	47.9	56.775	0	163.91	14520000000	144	5.59074	0	-1.00962	-17.0927	27.6522	27.6251	27.7862	27.6994	26.9651	27.2789	27.242	27.1961	28.0033	28.0367	28.0222	28.1008	27.1656	27.0052	27.0539	26.8999
+	4.04935	-2.49554	F8WJA0;Q9ESV0;Q3U7R4;A0A1Y7VKX7;Q3TLR1;Q3UYV7;A0A1Y7VLU4;Q9CRZ6;A0A1Y7VK75;A0A1Y7VMS6	F8WJA0;Q9ESV0;Q3U7R4;A0A1Y7VKX7;Q3TLR1;Q3UYV7	ATP-dependent RNA helicase DDX24	Ddx24	F8WJA0;Q9ESV0;Q3U7R4;A0A1Y7VKX7;Q3TLR1;Q3UYV7	Color2 [A=255, R=169, G=169, B=169]	1	4					+	LF_L	22	22	22	30.8	30.8	30.8	101.37	0	215.04	10327000000	142	4.04935	0	-2.49554	-9.26687	26.8856	26.6858	26.6331	26.8227	26.2803	26.8077	26.6305	26.7094	28.2709	28.4324	28.4124	28.2311	26.5894	25.8389	25.4985	25.4379
+	2.58946	-1.3711	Q6PF96;Q921G7	Q6PF96;Q921G7	Electron transfer flavoprotein-ubiquinone oxidoreductase, mitochondrial	Etfdh	Q6PF96;Q921G7	Color2 [A=255, R=169, G=169, B=169]	1	4					+	LF_L	14	14	14	34.4	34.4	34.4	61.16	0	106.51	10721000000	130	2.58946	0.00325797	-1.3711	-4.95169	28.0966	27.6764	27.9739	27.7935	27.0988	27.5283	27.4145	27.3093	27.385	26.7196	27.373	27.159	26.3951	25.8887	25.4103	25.4582
+	2.68249	-1.24447	X2EXD0;Q920L1;A0A494BBC6;A0A494BAD7;A0A494BBI5	X2EXD0;Q920L1;A0A494BBC6;A0A494BAD7	Fatty acid desaturase 1	Fads1	X2EXD0;Q920L1;A0A494BBC6;A0A494BAD7	Color2 [A=255, R=169, G=169, B=169]	1	4					+	LF_L	9	9	8	25.7	25.7	21.9	52.322	0	85.31	5143200000	71	2.68249	0.00274498	-1.24447	-5.84344	27.5161	27.148	27.4663	27.5133	27.0449	27.3089	27.3812	27.3674	26.9154	26.971	27.2626	27.0636	26.0354	25.3475	26.0431	NaN
+	4.85114	-1.83594	F2WWK6;F2WWK5;Q9Z0R9;A0A494BBD1	F2WWK6;F2WWK5;Q9Z0R9	Fatty acid desaturase 2	Fads2	F2WWK6;F2WWK5;Q9Z0R9	Color2 [A=255, R=169, G=169, B=169]	1	4					+	LF_L	9	9	9	21.2	21.2	21.2	51.384	0	28.977	7669500000	81	4.85114	0	-1.83594	-12.7806	28.21	27.8805	28.0659	27.9421	27.307	27.5393	27.4799	27.4359	27.7967	27.6645	27.5159	27.6634	25.5411	26.0895	26.0025	25.6636
+	3.27618	-2.51326	Q9CR98;A0A0N4SWI4	Q9CR98;A0A0N4SWI4	Protein FAM136A	Fam136a	Q9CR98;A0A0N4SWI4	Color2 [A=255, R=169, G=169, B=169]	1	4					+	LF_L	6	6	6	56.5	56.5	56.5	15.674	0	25.438	2313100000	38	3.27618	0.000143223	-2.51326	-7.87882	25.4328	23.6723	26.0228	26.0722	25.4011	NaN	NaN	NaN	27.6165	27.5051	27.646	27.4599	NaN	24.6395	24.6963	25.7951
+	1.68825	-1.07516	A0A494B9Z0;A0A494BBA8;Q642K5;Q3THB2;Q920W8;Q91V99;P62862	A0A494B9Z0;A0A494BBA8;Q642K5;Q3THB2;Q920W8;Q91V99;P62862	40S ribosomal protein S30	Fau;fau	A0A494B9Z0;A0A494BBA8;Q642K5;Q3THB2;Q920W8;Q91V99;P62862	Color2 [A=255, R=169, G=169, B=169]	1	4					+	LF_L	3	3	3	19	19	19	7.0062	0	9.2332	8781100000	34	1.68825	0.0174133	-1.07516	-3.12326	29.3175	28.3304	29.3732	28.8814	27.7748	28.8819	28.7188	28.1188	29.4495	29.6615	29.8783	29.457	29.0542	28.6264	27.5855	28.8796
+	2.53378	-1.9578	Q8BX90;F6TLV3;E0CXY0	Q8BX90;F6TLV3	Fibronectin type-III domain-containing protein 3A	Fndc3a	Q8BX90;F6TLV3	Color2 [A=255, R=169, G=169, B=169]	1	4					+	LF_L	15	15	15	23.4	23.4	23.4	131.96	0	73.822	3008100000	52	2.53378	0.00324205	-1.9578	-4.82484	NaN	NaN	NaN	NaN	NaN	23.442	NaN	NaN	27.2265	27.4273	27.649	27.349	26.3173	25.5348	24.3977	25.5707
+	2.72804	-1.00778	Q9DBE9	Q9DBE9	pre-rRNA processing protein FTSJ3	Ftsj3	Q9DBE9	Color2 [A=255, R=169, G=169, B=169]	1	4					+	LF_L	20	20	20	39	39	39	95.531	0	323.31	23495000000	207	2.72804	0.00252564	-1.00778	-5.27705	27.9624	27.6685	27.9228	27.8716	27.619	27.9365	27.7428	27.8561	28.6787	28.7668	28.3722	28.5746	27.887	27.7731	27.1111	27.5901
+	3.49614	-1.00355	Q91Z49;D3Z591	Q91Z49	UAP56-interacting factor	Fyttd1	Q91Z49	Color2 [A=255, R=169, G=169, B=169]	1	4					+	LF_L	4	4	4	16.7	16.7	16.7	35.887	0	39.008	955950000	22	3.49614	0	-1.00355	-7.37322	24.7278	24.4827	24.3707	24.6446	24.5111	24.1541	24.701	NaN	25.9165	26.1963	26.1697	26.2596	25.4355	24.9503	24.9673	25.1748
+	3.29237	-2.72315	Q8BK35;Q8R126;Q8BTX4;Q9CV23	Q8BK35;Q8R126;Q8BTX4		Gltscr2	Q8BK35;Q8R126;Q8BTX4	Color2 [A=255, R=169, G=169, B=169]	1	4					+	LF_L	8	8	8	22.5	22.5	22.5	55.792	0	48.347	3264300000	57	3.29237	0	-2.72315	-7.94178	26.4016	26.5013	26.7666	26.5392	26.0672	26.0494	26.2748	26.1266	27.0981	27.3357	27.0986	27.2739	24.1197	25.2783	24.0372	NaN
+	2.74602	-2.41126	Q3V3N5;Q3UJL0;Q99LH1;P70410	Q3V3N5;Q3UJL0;Q99LH1;P70410	Nucleolar GTP-binding protein 2	Gnl2	Q3V3N5;Q3UJL0;Q99LH1;P70410	Color2 [A=255, R=169, G=169, B=169]	1	4					+	LF_L	11	11	11	23.1	23.1	23.1	72.1	0	36.642	3913900000	55	2.74602	0.0024026	-2.41126	-7.38258	27.288	26.527	27.063	26.8504	26.1474	26.4215	26.8243	26.6686	27.7431	27.7954	26.9971	27.3445	25.3318	NaN	NaN	24.7857
+	6.06353	-1.29355	Q3TK27;Q8CI11;A0A2I3BPZ6;A0A2I3BRV9;A0A2I3BR82;A0A2I3BR32	Q3TK27;Q8CI11	Guanine nucleotide-binding protein-like 3	Gnl3	Q3TK27;Q8CI11	Color2 [A=255, R=169, G=169, B=169]	1	4					+	LF_L	18	18	18	44.4	44.4	44.4	60.786	0	262.79	23857000000	223	6.06353	0	-1.29355	-20.549	28.4455	28.2066	28.3614	28.3043	28.0528	28.1057	28.0929	28.0778	28.7618	28.7543	28.5382	28.7072	27.4492	27.4645	27.3227	27.3509
+	3.10381	-1.15597	Q99ME9;Q3UR29;Q3TPJ4;A0A217FL53;Q8CCQ5	Q99ME9;Q3UR29;Q3TPJ4	Nucleolar GTP-binding protein 1	Gtpbp4	Q99ME9;Q3UR29;Q3TPJ4	Color2 [A=255, R=169, G=169, B=169]	1	4					+	LF_L	22	22	22	41.8	41.8	41.8	74.112	0	86.813	20762000000	143	3.10381	0.000572707	-1.15597	-6.23546	28.1722	28.2704	28.1291	28.0832	28.0585	28.4472	28.3687	28.3065	29.2008	29.3547	28.9593	28.8127	28.2833	27.9776	27.6159	27.8268
+	2.26034	-1.1045	F8VQG4;Q9XRZ3;Q31129;Q7YP94;Q7YP88;G3UWY8;Q0WXH3;Q31166;Q8MHM0	F8VQG4;Q9XRZ3;Q31129;Q7YP94;Q7YP88;G3UWY8;Q0WXH3;Q31166;Q8MHM0		H2-T24	F8VQG4;Q9XRZ3;Q31129;Q7YP94;Q7YP88;G3UWY8;Q0WXH3;Q31166;Q8MHM0	Color2 [A=255, R=169, G=169, B=169]	1	4					+	LF_L	2	2	1	5.5	5.5	1.9	41.947	0	6.208	504700000	7	2.26034	0.00609393	-1.1045	-4.2315	24.1905	NaN	NaN	NaN	NaN	24.1487	24.2744	24.9449	25.7038	25.9684	25.9893	25.4519	25.0126	24.5517	24.0799	25.0512
+	2.34085	-1.77307	Q01237;F2Z470;Q6PB59;Q8BV96;F7CA39;F6X166	Q01237;F2Z470;Q6PB59;Q8BV96	3-hydroxy-3-methylglutaryl-coenzyme A reductase;3-hydroxy-3-methylglutaryl coenzyme A reductase	Hmgcr	Q01237;F2Z470;Q6PB59;Q8BV96	Color2 [A=255, R=169, G=169, B=169]	1	4					+	LF_L	8	8	8	14.4	14.4	14.4	97.039	0	32.655	1154100000	31	2.34085	0.00499759	-1.77307	-5.74079	24.9308	25.1654	24.9584	25.1833	25.3876	24.7303	25.0732	25.2146	26.3598	26.3736	27.0953	26.4645	NaN	25.0639	24.5366	NaN
+	2.86125	-1.3078	D3Z4E0;A0A0R4J0C2;O09046	D3Z4E0;A0A0R4J0C2;O09046	L-amino-acid oxidase	Il4i1	D3Z4E0;A0A0R4J0C2;O09046	Color2 [A=255, R=169, G=169, B=169]	1	4					+	LF_L	2	2	2	4.5	4.5	4.5	71.141	0	5.3252	221450000	4	2.86125	0.0017754	-1.3078	-7.91855	NaN	NaN	NaN	NaN	NaN	NaN	NaN	NaN	25.1703	25.2462	25.5821	25.1346	NaN	24.0753	NaN	23.8757
+	4.99171	-1.01974	Q921Y2	Q921Y2	U3 small nucleolar ribonucleoprotein protein IMP3	Imp3	Q921Y2	Color2 [A=255, R=169, G=169, B=169]	1	4					+	LF_L	6	6	6	47.3	47.3	47.3	21.777	0	30.788	4493800000	64	4.99171	0	-1.01974	-13.511	27.1819	26.9456	26.9591	26.6531	26.8901	27.1914	27.0394	26.8235	27.3598	27.3307	27.3276	27.423	26.5134	26.4037	26.2412	26.2037
+	5.96191	-1.35428	V9PVS1;U5NJN6;J7NUP1;A0A1G5SJL2;A0A1G5SJJ3;Q60766	V9PVS1;U5NJN6;J7NUP1;A0A1G5SJL2;A0A1G5SJJ3;Q60766	Immunity-related GTPase family M protein 1	Irgm1	V9PVS1;U5NJN6;J7NUP1;A0A1G5SJL2;A0A1G5SJJ3;Q60766	Color2 [A=255, R=169, G=169, B=169]	1	4					+	LF_L	16	16	14	55.2	55.2	53.2	44.901	0	177.3	15141000000	133	5.96191	0	-1.35428	-19.7531	25.809	25.5739	25.2748	25.91	25.3861	25.9747	25.689	25.7548	29.0963	29.1396	28.9507	29.0305	27.8088	27.7463	27.6935	27.5515
+	2.11735	-1.71687	A2AIV2;E9PZY8;Q8CFK9	A2AIV2;E9PZY8;Q8CFK9	Protein virilizer homolog	Kiaa1429	A2AIV2;E9PZY8;Q8CFK9	Color2 [A=255, R=169, G=169, B=169]	1	4					+	LF_L	14	14	14	11.4	11.4	11.4	201.44	0	54.219	955520000	31	2.11735	0.00813445	-1.71687	-4.31144	23.6222	23.6323	NaN	23.05	23.159	23.4691	NaN	NaN	25.7639	26.378	25.6249	26.2973	NaN	24.6743	23.511	24.7122
+	4.76478	-1.58534	Q52L97;P52293;Q641N9;A2A600;A2A601;A6PW68;F2Z431;A2A602	Q52L97;P52293;Q641N9	Importin subunit alpha;Importin subunit alpha-1	Kpna2	Q52L97;P52293;Q641N9	Color2 [A=255, R=169, G=169, B=169]	1	4					+	LF_L	16	16	16	52	52	52	57.927	0	149.49	15886000000	172	4.76478	0	-1.58534	-12.3504	28.1545	28.1093	28.0142	28.2424	27.7012	27.522	27.5691	27.4843	27.8504	27.8492	28.0146	27.936	26.5544	26.522	26.1032	26.1294
+	2.57403	-1.90878	Q8BGA5;G3UZA0;Q8BVE7	Q8BGA5;G3UZA0;Q8BVE7	KRR1 small subunit processome component homolog	Krr1	Q8BGA5;G3UZA0;Q8BVE7	Color2 [A=255, R=169, G=169, B=169]	1	4					+	LF_L	8	8	8	25.5	25.5	25.5	43.537	0	20.921	1579500000	46	2.57403	0.00322063	-1.90878	-4.91632	25.7501	NaN	25.0623	24.8784	NaN	25.0319	25.377	25.4452	27.2291	27.2862	25.9252	27.1269	25.5382	25.0864	24.7379	24.5697
+	4.00258	-1.51714	P11152;Q3UB54;Q8C562;Q4FJQ8;Q3UCZ2;Q3UCH4;Q3UC81;Q3UCD4;Q3UB98;Q3U841;Q3U784;Q3U5U0;Q3UC44;Q3UAX2;Q3UBE9;Q3U6S8;Q3U715;Q3U9P4;Q3U831	P11152;Q3UB54;Q8C562;Q4FJQ8;Q3UCZ2;Q3UCH4;Q3UC81;Q3UCD4;Q3UB98;Q3U841;Q3U784;Q3U5U0;Q3UC44;Q3UAX2;Q3UBE9;Q3U6S8;Q3U715	Lipoprotein lipase	Lpl	P11152;Q3UB54;Q8C562;Q4FJQ8;Q3UCZ2;Q3UCH4;Q3UC81;Q3UCD4;Q3UB98;Q3U841;Q3U784;Q3U5U0;Q3UC44;Q3UAX2;Q3UBE9;Q3U6S8;Q3U715	Color2 [A=255, R=169, G=169, B=169]	1	4					+	LF_L	7	7	7	17.1	17.1	17.1	53.109	0	45.226	7938600000	68	4.00258	0	-1.51714	-9.09192	27.7615	27.6555	27.7876	27.7695	28.1487	28.2856	28.1118	28.2892	28.3836	28.3747	28.2637	28.5729	26.4214	27.044	26.9967	27.0644
+	4.52634	-1.08701	Q3UM18	Q3UM18	Large subunit GTPase 1 homolog	Lsg1	Q3UM18	Color2 [A=255, R=169, G=169, B=169]	1	4					+	LF_L	14	14	14	24.5	24.5	24.5	73.156	0	51.212	3182000000	65	4.52634	0	-1.08701	-11.2316	25.9595	26.0184	25.7112	25.6122	25.4959	25.9743	25.8351	25.7884	26.7335	26.5869	26.6674	26.5093	25.5508	25.3197	25.7278	25.5508
+	3.40945	-1.25721	Q8VCF0;Q3U5B1	Q8VCF0;Q3U5B1	Mitochondrial antiviral-signaling protein	Mavs	Q8VCF0;Q3U5B1	Color2 [A=255, R=169, G=169, B=169]	1	4					+	LF_L	8	8	8	29.6	29.6	29.6	53.398	0	110.59	2634600000	49	3.40945	0	-1.25721	-7.10848	26.3189	25.0419	24.8293	25.9995	25.7594	25.8303	26.1993	26.04	26.9325	27.2534	27.2104	27.2282	25.4778	25.8727	26.2445	26.0006
+	2.99848	-1.14213	A2ANY6;J3QMC5;Q3TPE2;Q6R5G2;Q5U481;Q6IQZ8;Q8CAR9;Q497I1;REV__A0A1W2P863;REV__Q04690	A2ANY6;J3QMC5		Mdn1	A2ANY6;J3QMC5	Color2 [A=255, R=169, G=169, B=169]	1	4					+	LF_L	44	44	44	12.2	12.2	12.2	630.33	0	151.03	3814700000	164	2.99848	0.00115663	-1.14213	-5.95485	25.2534	25.2597	25.1705	24.736	24.9573	24.8426	24.6932	25.1714	26.5042	25.8681	26.1871	26.3009	25.2907	24.6827	25.0737	25.2448
+	2.03651	-2.39432	E9PVX6;A0A1B0GQV9	E9PVX6		Mki67	E9PVX6	Color2 [A=255, R=169, G=169, B=169]	1	4					+	LF_L	34	34	34	17.6	17.6	17.6	350.86	0	186.57	6470300000	138	2.03651	0.009004	-2.39432	-4.71676	27.2287	26.9206	27.2801	27.2454	26.7414	26.4156	26.4103	26.6929	24.3147	25.481	23.955	24.6546	21.986	NaN	NaN	22.428
+	3.0791	-1.00003	Q9ERS2	Q9ERS2	NADH dehydrogenase [ubiquinone] 1 alpha subcomplex subunit 13	Ndufa13	Q9ERS2	Color2 [A=255, R=169, G=169, B=169]	1	4					+	LF_L	6	6	6	48.6	48.6	48.6	16.859	0	26.675	9264200000	51	3.0791	0.000665227	-1.00003	-6.16876	28.3841	28.4102	28.0988	28.3809	28.0138	28.1736	28.2771	28.3793	28.6051	28.4379	28.4223	28.4601	27.8851	27.5721	27.2514	27.2166
+	4.19776	-1.11819	Q9CPP6;Q9CX78;D3YTQ8	Q9CPP6;Q9CX78	NADH dehydrogenase [ubiquinone] 1 alpha subcomplex subunit 5	Ndufa5	Q9CPP6;Q9CX78	Color2 [A=255, R=169, G=169, B=169]	1	4					+	LF_L	4	4	4	44.8	44.8	44.8	13.36	0	18.59	3444000000	39	4.19776	0	-1.11819	-12.2782	27.067	26.9484	27.3697	27.0311	26.7091	26.8974	27.0618	27.1176	27.3725	27.4287	27.2207	27.152	NaN	26.1764	26.2778	26.0717
+	2.58605	-1.45084	Q9CQZ5;A0A2R8W6V1;A0A2R8VI90	Q9CQZ5	NADH dehydrogenase [ubiquinone] 1 alpha subcomplex subunit 6	Ndufa6	Q9CQZ5	Color2 [A=255, R=169, G=169, B=169]	1	4					+	LF_L	6	6	6	51.9	51.9	51.9	15.283	0	24.265	7650200000	61	2.58605	0.00324387	-1.45084	-4.94385	28.0144	27.6521	27.6126	27.7759	27.4112	27.6536	27.5203	27.4596	27.7439	27.6779	27.9417	27.6081	25.7571	26.7516	25.8443	26.8152
+	4.92325	-1.10762	Q9DCJ5;A0A1S6GWI0	Q9DCJ5;A0A1S6GWI0	NADH dehydrogenase [ubiquinone] 1 alpha subcomplex subunit 8	Ndufa8	Q9DCJ5;A0A1S6GWI0	Color2 [A=255, R=169, G=169, B=169]	1	4					+	LF_L	8	8	8	59.9	59.9	59.9	19.992	0	37.466	13058000000	87	4.92325	0	-1.10762	-13.1505	28.4462	28.021	27.8617	28.1018	27.7029	27.9224	27.8841	27.8702	28.2316	28.1974	28.5311	28.1832	27.2228	27.1746	27.1376	27.1778
+	1.88515	-1.23012	Q923F9;E9QPX3;Q9CXZ1;A0A338P7A0;Q9CTT4	Q923F9;E9QPX3;Q9CXZ1	NADH dehydrogenase [ubiquinone] iron-sulfur protein 4, mitochondrial	Ndufs4	Q923F9;E9QPX3;Q9CXZ1	Color2 [A=255, R=169, G=169, B=169]	1	4					+	LF_L	5	5	5	44.4	44.4	44.4	18.518	0	19.177	3387700000	25	1.88515	0.0114986	-1.23012	-3.48723	27.7174	27.441	27.3105	27.5033	25.884	27.2919	27.2116	NaN	28.2954	27.7542	26.8131	27.0824	26.3286	26.1294	26.0308	26.536
+	4.61672	-1.17524	P52503;A0A1Y7VM38;A0A1Y7VKP8	P52503;A0A1Y7VM38;A0A1Y7VKP8	NADH dehydrogenase [ubiquinone] iron-sulfur protein 6, mitochondrial	Ndufs6	P52503;A0A1Y7VM38;A0A1Y7VKP8	Color2 [A=255, R=169, G=169, B=169]	1	4					+	LF_L	4	4	4	48.3	48.3	48.3	13.02	0	71.315	9072300000	52	4.61672	0	-1.17524	-11.6441	28.8907	28.6309	28.9839	28.6543	28.2168	28.3863	28.3173	28.5454	28.6241	28.5381	28.8274	28.5721	27.4553	27.5905	27.5647	27.2502
+	2.44508	-1.10719	Q9DC70	Q9DC70	NADH dehydrogenase [ubiquinone] iron-sulfur protein 7, mitochondrial	Ndufs7	Q9DC70	Color2 [A=255, R=169, G=169, B=169]	1	4					+	LF_L	4	4	4	25	25	25	24.683	0	40.116	5838700000	32	2.44508	0.00385974	-1.10719	-4.62711	28.323	27.8379	28.1404	28.0353	27.5877	27.759	27.9013	27.76	27.9789	28.0344	27.9733	27.1344	26.3949	26.8949	26.6867	26.7157
+	4.11333	-1.08307	Q8VC72;Q5M9P5;Q3UY05;Q8K3J1;A0A494BAW8	Q8VC72;Q5M9P5;Q3UY05;Q8K3J1;A0A494BAW8	NADH dehydrogenase [ubiquinone] iron-sulfur protein 8, mitochondrial	Ndufs8	Q8VC72;Q5M9P5;Q3UY05;Q8K3J1;A0A494BAW8	Color2 [A=255, R=169, G=169, B=169]	1	4					+	LF_L	4	4	4	21.2	21.2	21.2	24.011	0	24.542	4628400000	35	4.11333	0	-1.08307	-9.51101	28.5019	27.6352	27.9094	28.4149	27.2835	27.312	27.6356	27.5419	27.3525	27.3308	27.4305	27.2533	26.2888	26.3027	26.4806	25.9627
+	5.19528	-1.13725	Q9D6J6;M0QWP9;D6RGN4	Q9D6J6	NADH dehydrogenase [ubiquinone] flavoprotein 2, mitochondrial	Ndufv2	Q9D6J6	Color2 [A=255, R=169, G=169, B=169]	1	4					+	LF_L	11	11	11	55.6	55.6	55.6	27.285	0	97.523	17318000000	107	5.19528	0	-1.13725	-14.6391	28.9959	28.632	28.7571	28.6583	28.3384	28.5125	28.5881	28.3779	28.6516	28.5899	28.6283	28.6596	27.6596	27.5868	27.3425	27.3915
+	2.79533	-1.37297	Q8BK30	Q8BK30	NADH dehydrogenase [ubiquinone] flavoprotein 3, mitochondrial	Ndufv3	Q8BK30	Color2 [A=255, R=169, G=169, B=169]	1	4					+	LF_L	1	1	1	10.6	10.6	10.6	11.813	0	8.3287	707120000	8	2.79533	0.00234014	-1.37297	-11.016	NaN	NaN	27.6638	NaN	26.3083	NaN	NaN	26.651	26.8335	NaN	NaN	26.7861	25.625	25.3717	25.3138	NaN
+	4.25415	-1.21412	Q91VE6;E0CXU3	Q91VE6	MKI67 FHA domain-interacting nucleolar phosphoprotein	Nifk	Q91VE6	Color2 [A=255, R=169, G=169, B=169]	1	4					+	LF_L	10	10	10	41.6	41.6	41.6	36.265	0	69.733	8977200000	77	4.25415	0	-1.21412	-10.0688	28.1698	27.6551	27.8513	27.6309	27.4997	27.941	28.061	27.8562	28.3887	28.7217	28.4339	28.53	27.4706	27.3794	27.031	27.3369
+	3.12561	-1.06898	Q5SVF7;Q3UGS1;O55125;Q5SVG6	Q5SVF7;Q3UGS1;O55125	Protein NipSnap homolog 1	Nipsnap1	Q5SVF7;Q3UGS1;O55125	Color2 [A=255, R=169, G=169, B=169]	1	4					+	LF_L	3	3	3	13	13	13	33.363	0	6.4688	721130000	12	3.12561	0.000454545	-1.06898	-9.28373	25.0499	25.1047	NaN	25.674	25.7728	24.2651	25.8322	26.0139	25.4378	25.2347	25.2913	25.558	24.3694	24.2536	NaN	NaN
+	3.55795	-1.41852	Q9JJF3	Q9JJF3	Bifunctional lysine-specific demethylase and histidyl-hydroxylase NO66	No66	Q9JJF3	Color2 [A=255, R=169, G=169, B=169]	1	4					+	LF_L	12	12	12	30.5	30.5	30.5	67.556	0	94.173	3009500000	68	3.55795	0	-1.41852	-7.56689	25.9462	25.7893	24.7823	25.4133	25.6771	25.9283	25.7644	26.0326	26.672	26.5972	26.2944	26.5815	24.8809	24.7815	25.4576	25.3509
+	3.03267	-1.08995	Q3UFZ4;Q3TUB5;Q5RJG1;Q3TPG4	Q3UFZ4;Q3TUB5;Q5RJG1;Q3TPG4	Nucleolar protein 10	Nol10	Q3UFZ4;Q3TUB5;Q5RJG1;Q3TPG4	Color2 [A=255, R=169, G=169, B=169]	1	4					+	LF_L	12	12	12	19.1	19.1	19.1	80.09	0	71.333	3617500000	66	3.03267	0.000962656	-1.08995	-6.04484	26.0685	25.9497	25.867	25.81	25.4113	26.1483	26.213	26.231	27.15	27.1984	27.2678	27.39	26.4953	26.4185	25.9198	25.8127
+	3.95523	-1.2423	Q9D7Z3;A1L3B6;A0A1Y7VMS4	Q9D7Z3;A1L3B6	Nucleolar protein 7	Nol7	Q9D7Z3;A1L3B6	Color2 [A=255, R=169, G=169, B=169]	1	4					+	LF_L	4	4	4	18.9	18.9	18.9	28.97	0	37.486	3558700000	44	3.95523	0	-1.2423	-8.91778	26.7378	26.7375	26.646	26.5068	26.5943	26.687	26.6661	26.8484	27.4236	27.3058	27.3866	27.088	26.265	26.2449	25.9364	25.7886
+	3.45358	-1.12245	A0A286YDA2;A0A286YDT3;E9Q5C9;A0A286YDV7;A0A286YCD1;A0A286YDZ1;Q8C000;B2RQA0	A0A286YDA2;A0A286YDT3;E9Q5C9;A0A286YDV7		Nolc1	A0A286YDA2;A0A286YDT3;E9Q5C9;A0A286YDV7	Color2 [A=255, R=169, G=169, B=169]	1	4					+	LF_L	12	12	12	22.7	22.7	22.7	73.427	0	240.63	28667000000	131	3.45358	0	-1.12245	-7.24223	28.6968	28.8106	28.5893	28.7138	28.5135	28.2786	28.2726	28.0504	29.7122	29.8268	29.8001	29.501	28.1895	28.6387	28.7337	28.7885
+	3.90508	-1.0086	Q9CPT5;D3Z7M5	Q9CPT5;D3Z7M5	Nucleolar protein 16	Nop16	Q9CPT5;D3Z7M5	Color2 [A=255, R=169, G=169, B=169]	1	4					+	LF_L	9	9	9	48.3	48.3	48.3	21.139	0	90.43	10909000000	90	3.90508	0	-1.0086	-8.73654	27.8591	27.5405	27.6659	27.4105	27.309	27.4234	27.2671	27.4875	28.0358	28.0096	28.0693	27.8327	27.2259	27.0681	26.8051	26.8137
+	3.961	-1.30555	Q8QZY7;O35375;Q8K2T3;Q8BPZ0	Q8QZY7;O35375	Neuropilin-2	Nrp2	Q8QZY7;O35375	Color2 [A=255, R=169, G=169, B=169]	1	4					+	LF_L	22	22	1	37.4	37.4	1.8	104.05	0	174.46	9944200000	140	3.961	0	-1.30555	-8.93885	26.6251	26.6859	26.9037	26.5779	26.554	26.7009	26.6464	26.5042	28.0203	27.7477	27.7561	27.6873	26.7704	26.2753	26.2915	26.652
+	1.84886	-1.66012	Q69Z38;A0A087WQ01	Q69Z38;A0A087WQ01	Pseudopodium-enriched atypical kinase 1	Peak1	Q69Z38;A0A087WQ01	Color2 [A=255, R=169, G=169, B=169]	1	4					+	LF_L	10	10	10	10	10	10	191.09	0	52.546	743360000	24	1.84886	0.0123772	-1.66012	-3.68885	NaN	NaN	NaN	NaN	NaN	NaN	NaN	NaN	24.8278	26.0828	25.576	25.7626	NaN	24.065	23.1706	24.471
+	2.05485	-1.43609	D3YUW8;D3YUX1;Q3TSQ2;Q0VGT3;B9EIG6;Q8BZH4	D3YUW8;D3YUX1;Q3TSQ2;Q0VGT3;B9EIG6;Q8BZH4	Pogo transposable element with ZNF domain	Pogz	D3YUW8;D3YUX1;Q3TSQ2;Q0VGT3;B9EIG6;Q8BZH4	Color2 [A=255, R=169, G=169, B=169]	1	4					+	LF_L	16	16	16	17.1	17.1	17.1	144.86	0	66.793	2495500000	61	2.05485	0.00871587	-1.43609	-3.81484	25.7296	24.5785	25.5579	25.2916	25.2634	25.3549	25.6394	25.6369	26.582	27.4463	26.0829	26.8321	25.6698	24.8284	24.919	25.7818
+	2.58932	-1.44314	Q3UDD3;Q8BG81;Q3U8V1;Q3TJ78;Q571G8;F6VR84;Q8C713	Q3UDD3;Q8BG81;Q3U8V1;Q3TJ78;Q571G8;F6VR84	Polymerase delta-interacting protein 3	Poldip3	Q3UDD3;Q8BG81;Q3U8V1;Q3TJ78;Q571G8;F6VR84	Color2 [A=255, R=169, G=169, B=169]	1	4					+	LF_L	10	10	9	32.7	32.7	32.5	42.935	0	54.448	2592000000	68	2.58932	0.00325326	-1.44314	-4.95137	26.1113	25.8811	26.0716	26.1143	25.2785	25.6189	25.4936	NaN	26.2377	26.187	26.3031	26.0606	23.8971	25.1159	24.9963	25.0065
+	1.95301	-1.26416	Q9D4G5;Q8K205	Q9D4G5;Q8K205		Pop1	Q9D4G5;Q8K205	Color2 [A=255, R=169, G=169, B=169]	1	4					+	LF_L	13	13	13	15.7	15.7	15.7	114.03	0	72.764	2290100000	54	1.95301	0.0108364	-1.26416	-3.61658	25.0575	25.4288	24.6571	25.4608	25.1444	24.9911	23.2995	22.9359	26.5514	26.2592	26.619	26.2733	25.4615	25.4959	24.1519	25.5369
+	1.51367	-1.27495	Q61207;Q3TWL8;Q3UFE8;B2RUD7;K3W4L3;Q8BFQ1;Q3U8C4;Q3UAS4;Q3TXP9;Q3U825;Q3TWE9;Q3TIT5;Q3U897;Q3TXJ0;Q3UE29;E9PZ00;J3QPG5;Q3U5W2;Q3TID4;Q3TKB2;Q3TKK3;Q3TWF9;Q3TWM9	Q61207;Q3TWL8;Q3UFE8;B2RUD7;K3W4L3;Q8BFQ1;Q3U8C4;Q3UAS4;Q3TXP9;Q3U825;Q3TWE9;Q3TIT5;Q3U897;Q3TXJ0;Q3UE29;E9PZ00;J3QPG5;Q3U5W2;Q3TID4;Q3TKB2;Q3TKK3;Q3TWF9;Q3TWM9	Prosaposin	Psap	Q61207;Q3TWL8;Q3UFE8;B2RUD7;K3W4L3;Q8BFQ1;Q3U8C4;Q3UAS4;Q3TXP9;Q3U825;Q3TWE9;Q3TIT5;Q3U897;Q3TXJ0;Q3UE29;E9PZ00;J3QPG5;Q3U5W2;Q3TID4;Q3TKB2;Q3TKK3;Q3TWF9;Q3TWM9	Color2 [A=255, R=169, G=169, B=169]	1	4					+	LF_L	7	7	7	16.3	16.3	16.3	61.422	0	35.553	6667300000	69	1.51367	0.0241795	-1.27495	-2.8128	27.3576	27.3345	27.3066	27.5542	27.5512	28.039	27.5795	28.0498	27.6628	27.3341	27.4803	27.7244	25.6319	25.3927	27.118	26.9591
+	1.3955	-1.08764	Q9DCV4;A2AGJ2	Q9DCV4	Regulator of microtubule dynamics protein 1	Rmdn1	Q9DCV4	Color2 [A=255, R=169, G=169, B=169]	1	4					+	LF_L	7	7	7	23.6	23.6	23.6	35	0	17.292	1081300000	19	1.3955	0.0317131	-1.08764	-2.75177	24.4538	24.6875	NaN	24.9383	24.8056	24.9406	24.8689	NaN	25.9559	26.475	25.1051	25.8033	24.2646	24.8626	NaN	25.1144
+	3.16472	-1.12544	Q9D8M4;Q3U8B9;Q99L18;A0A3B2WD11;Q9D9F1	Q9D8M4;Q3U8B9	60S ribosomal protein L7-like 1	Rpl7l1	Q9D8M4;Q3U8B9	Color2 [A=255, R=169, G=169, B=169]	1	4					+	LF_L	7	7	7	35.8	35.8	35.8	28.543	0	22.316	7507300000	66	3.16472	0.000464037	-1.12544	-6.40232	27.9928	27.7321	27.5498	27.636	27.5757	27.9224	27.7467	27.7054	28.308	28.3648	28.8125	28.0702	27.2494	27.4888	27.0893	27.2262
+	3.08895	-1.38399	A2AVJ7;Q99PL5;Q6ZPS0;Q8CAB9;Q8C7E8;Q3ULC0	A2AVJ7;Q99PL5;Q6ZPS0	Ribosome-binding protein 1	Rrbp1	A2AVJ7;Q99PL5;Q6ZPS0	Color2 [A=255, R=169, G=169, B=169]	1	4					+	LF_L	34	34	32	29.9	29.9	27.5	158.39	0	323.31	24412000000	254	3.08895	0.000676923	-1.38399	-6.19528	27.0321	27.1994	27.0587	26.9759	27.2526	27.0447	27.0731	26.7056	28.8575	28.383	28.924	28.5991	26.8681	27.1339	27.5693	27.6565
+	4.87069	-2.64104	P56183;Q05CN2;A0A1W2P7C5;Q05DT3	P56183;Q05CN2	Ribosomal RNA processing protein 1 homolog A	Rrp1	P56183;Q05CN2	Color2 [A=255, R=169, G=169, B=169]	1	4					+	LF_L	10	10	10	29.4	29.4	29.4	54.776	0	157.04	3464300000	56	4.87069	0	-2.64104	-12.8799	27.4524	25.2201	26.5307	26.7719	26.125	26.243	26.4598	26.1807	27.728	27.6964	27.3084	27.5608	25.3238	24.837	24.4769	25.0917
+	4.14328	-1.041	Q5EBK7;E9PY85;Q99L28;G3UW80;Q3U5N8;G3UZF1	Q5EBK7;E9PY85;Q99L28;G3UW80;Q3U5N8;G3UZF1	Probable ribosome biogenesis protein RLP24	Rsl24d1	Q5EBK7;E9PY85;Q99L28;G3UW80;Q3U5N8;G3UZF1	Color2 [A=255, R=169, G=169, B=169]	1	4					+	LF_L	2	2	2	16.6	16.6	16.6	19.611	0	12.072	4469500000	20	4.14328	0	-1.041	-9.62726	28.072	27.8108	28.0511	27.8528	27.8641	28.2222	28.0017	28.1429	28.8286	28.67	28.5166	28.4863	27.635	27.7374	27.3848	27.5804
+	2.52392	-2.03425	Q61112	Q61112	45 kDa calcium-binding protein	Sdf4	Q61112	Color2 [A=255, R=169, G=169, B=169]	1	4					+	LF_L	10	10	10	31	31	31	42.064	0	33.28	2493300000	43	2.52392	0.00321978	-2.03425	-5.37898	24.7241	NaN	24.4874	NaN	NaN	25.8285	24.9729	25.9418	27.4903	27.5599	27.3134	27.1544	26.1783	25.1349	24.7225	NaN
+	3.80415	-1.65163	Q547B5;F8WIP8;P10923;Q3UZY3;Q3UBR1;Q3TND2;Q66JX3;Q3TLP1;D3Z4N2;D3Z513	Q547B5;F8WIP8;P10923;Q3UZY3;Q3UBR1;Q3TND2	Osteopontin	Spp1	Q547B5;F8WIP8;P10923;Q3UZY3;Q3UBR1;Q3TND2	Color2 [A=255, R=169, G=169, B=169]	1	4					+	LF_L	7	7	7	41.8	41.8	41.8	32.459	0	73.438	5713400000	46	3.80415	0	-1.65163	-8.38148	NaN	NaN	NaN	NaN	NaN	23.0054	NaN	22.542	28.5808	28.347	28.2211	28.439	26.6327	26.2857	26.9631	27.0998
+	2.59913	-1.46095	P52019;Q3TQK8;Q3TSS7	P52019;Q3TQK8;Q3TSS7	Squalene monooxygenase	Sqle	P52019;Q3TQK8;Q3TSS7	Color2 [A=255, R=169, G=169, B=169]	1	4					+	LF_L	11	11	11	29.4	29.4	29.4	63.769	0	46.124	3103300000	48	2.59913	0.0031462	-1.46095	-5.5956	26.889	26.2381	26.6014	26.2933	25.8921	26.0959	26.121	25.089	27.0281	26.7713	27.0976	26.6565	25.9532	25.0252	NaN	25.3039
+	3.78957	-1.00108	A0A3Q4EGQ6;Q8VHA8;Q8BKL1;Q8VHB0;Q8VHA9;Q8BJJ6;Q8BJH8;Q62280;A0A3Q4EI07;Q3U3G9;Q6P1I1	A0A3Q4EGQ6;Q8VHA8;Q8BKL1;Q8VHB0;Q8VHA9;Q8BJJ6;Q8BJH8;Q62280;A0A3Q4EI07;Q3U3G9;Q6P1I1	Protein SSXT	Ss18	A0A3Q4EGQ6;Q8VHA8;Q8BKL1;Q8VHB0;Q8VHA9;Q8BJJ6;Q8BJH8;Q62280;A0A3Q4EI07;Q3U3G9;Q6P1I1	Color2 [A=255, R=169, G=169, B=169]	1	4					+	LF_L	2	2	2	42.6	42.6	42.6	6.9079	0	6.2138	751710000	19	3.78957	0	-1.00108	-8.33122	24.8499	25.0956	24.9997	25.0195	24.6258	24.8681	24.7104	24.7619	25.8289	25.799	25.6318	25.9898	24.9559	24.6302	24.6647	24.9944
+	3.31687	-1.12832	Q8VIB3;Q8BLV1	Q8VIB3;Q8BLV1	Type 2 lactosamine alpha-2,3-sialyltransferase	St3gal6	Q8VIB3;Q8BLV1	Color2 [A=255, R=169, G=169, B=169]	1	4					+	LF_L	4	4	4	17.6	17.6	17.6	37.854	0	33.62	3091300000	38	3.31687	0	-1.12832	-6.83436	26.7839	26.2267	26.486	26.3165	25.9736	26.3671	26.0913	26.4054	27.5038	27.1059	27.3442	27.4887	26.003	26.6046	26.0521	26.2696
+	1.81624	-1.13447	Q05BH6;H3BL37;O08784;Q7TPZ2;H3BIX0;F6R3V4;Q6PFZ6;Q3TBZ3;H3BK88	Q05BH6;H3BL37;O08784;Q7TPZ2;H3BIX0;F6R3V4;Q6PFZ6	Treacle protein	Tcof1	Q05BH6;H3BL37;O08784;Q7TPZ2;H3BIX0;F6R3V4;Q6PFZ6	Color2 [A=255, R=169, G=169, B=169]	1	4					+	LF_L	14	14	8	18.4	18.4	11.2	126.37	0	99.278	4222900000	78	1.81624	0.0130113	-1.13447	-3.358	25.3471	25.9773	25.9976	25.3566	24.6127	24.8455	24.4031	24.9702	27.8327	27.1097	28.0102	26.8734	25.9422	26.6946	26.0273	26.6241
+	1.95004	-1.24825	A0A0R4J1N9;Q3TSW9;P40630;D3Z0F3	A0A0R4J1N9;Q3TSW9;P40630;D3Z0F3	Transcription factor A, mitochondrial	Tfam	A0A0R4J1N9;Q3TSW9;P40630;D3Z0F3	Color2 [A=255, R=169, G=169, B=169]	1	4					+	LF_L	7	7	7	35.7	35.7	35.7	23.384	0	14.815	3953100000	43	1.95004	0.010795	-1.24825	-3.61088	26.882	26.8093	28.2849	26.6502	26.5863	27.0561	27.842	26.9915	27.2281	26.6796	27.1688	26.9743	26.4223	26.1992	25.0914	25.3449
+	2.10843	-1.18871	Q3UNK5;P04202	Q3UNK5;P04202	Transforming growth factor beta-1;Latency-associated peptide	Tgfb1	Q3UNK5;P04202	Color2 [A=255, R=169, G=169, B=169]	1	4					+	LF_L	9	9	9	37.7	37.7	37.7	44.309	0	43.426	3005500000	45	2.10843	0.0082	-1.18871	-3.92128	24.1611	24.5791	24.9313	24.563	24.2738	24.3581	24.2554	24.345	27.8488	27.981	26.8323	28.0047	26.3174	26.3522	26.8184	26.424
+	3.96991	-1.40211	P62075;A0A1W2P7H2;A0A1W2P756	P62075;A0A1W2P7H2;A0A1W2P756	Mitochondrial import inner membrane translocase subunit Tim13	Timm13	P62075;A0A1W2P7H2;A0A1W2P756	Color2 [A=255, R=169, G=169, B=169]	1	4					+	LF_L	6	6	6	77.9	77.9	77.9	10.458	0	83.137	16298000000	67	3.96991	0	-1.40211	-8.97144	28.9463	29.1138	28.7713	28.7017	28.4807	28.5183	28.5531	28.4171	30.0372	30.1	29.787	29.902	28.6941	28.6241	28.1432	28.7564
+	4.06963	-1.28041	Q9WVA2;Q4FZG7	Q9WVA2	Mitochondrial import inner membrane translocase subunit Tim8 A	Timm8a1	Q9WVA2	Color2 [A=255, R=169, G=169, B=169]	1	4					+	LF_L	3	3	3	52.6	52.6	52.6	11.042	0	37.499	3140700000	39	4.06963	0	-1.28041	-9.34365	25.9486	25.8286	25.885	25.9906	25.8867	26.0799	25.5381	24.309	27.1083	27.3894	27.3679	27.589	26.2313	26.1855	26.108	25.8082
+	3.45237	-1.19636	P62077	P62077	Mitochondrial import inner membrane translocase subunit Tim8 B	Timm8b	P62077	Color2 [A=255, R=169, G=169, B=169]	1	4					+	LF_L	2	2	2	28.9	28.9	28.9	9.2864	0	17.94	1685800000	20	3.45237	0	-1.19636	-7.23854	26.4595	27.0044	27.1923	26.438	NaN	26.0417	26.3094	26.2464	27.2813	27.2913	26.9836	27.2488	26.4125	26.0081	25.7185	25.8805
+	2.64311	-1.31091	Q3U593;P06804;A0A0R4J210;A0A0U5J4W4;Q0X0E6;Q3U4I6;Q6TDG3	Q3U593;P06804;A0A0R4J210;A0A0U5J4W4;Q0X0E6;Q3U4I6	Tumor necrosis factor;Tumor necrosis factor, membrane form;Intracellular domain 1;Intracellular domain 2;C-domain 1;C-domain 2;Tumor necrosis factor, soluble form	Tnf	Q3U593;P06804;A0A0R4J210;A0A0U5J4W4;Q0X0E6;Q3U4I6	Color2 [A=255, R=169, G=169, B=169]	1	4					+	LF_L	12	12	12	71.9	71.9	71.9	25.895	0	41.051	4183600000	50	2.64311	0.00285196	-1.31091	-5.07598	NaN	NaN	NaN	NaN	NaN	NaN	NaN	NaN	27.824	27.7556	27.4649	27.3256	25.5941	26.4808	26.5023	26.5493
+	1.93153	-2.33776	Q8VDF2;E9Q5Y5	Q8VDF2	E3 ubiquitin-protein ligase UHRF1	Uhrf1	Q8VDF2	Color2 [A=255, R=169, G=169, B=169]	1	4					+	LF_L	19	19	19	33.2	33.2	33.2	88.303	0	95.846	4077900000	98	1.93153	0.0108701	-2.33776	-3.5754	27.1821	26.7291	26.3349	26.5926	25.9719	26.0561	26.0722	26.379	26.0735	26.1825	26.2817	25.9603	24.8208	24.9783	22.4432	22.9046
+	2.29681	-1.50697	Q3TN42;Q8C7V3	Q3TN42;Q8C7V3	U3 small nucleolar RNA-associated protein 15 homolog	Utp15	Q3TN42;Q8C7V3	Color2 [A=255, R=169, G=169, B=169]	1	4					+	LF_L	13	13	13	32.8	32.8	32.8	59.417	0	99.497	9184600000	123	2.29681	0.00549001	-1.50697	-4.30793	27.5122	26.8845	26.7675	26.7323	26.7827	27.2346	26.9539	26.9534	27.5084	27.8007	27.6968	27.4703	26.5566	26.5823	26.1828	25.1266
+	2.42375	-1.61201	F2Z446	F2Z446	Vacuolar ATPase assembly integral membrane protein Vma21	Vma21	F2Z446	Color2 [A=255, R=169, G=169, B=169]	1	4					+	LF_L	1	1	1	19.2	19.2	19.2	13.358	0	40.008	1048300000	11	2.42375	0.00403581	-1.61201	-5.10029	NaN	NaN	NaN	NaN	NaN	NaN	NaN	24.3786	27.1893	27.4328	26.3463	27.045	25.3947	25.0704	NaN	25.7089
+	3.1026	-1.02455	Q8BHB4;H3BJD8;H3BLC1	Q8BHB4	WD repeat-containing protein 3	Wdr3	Q8BHB4	Color2 [A=255, R=169, G=169, B=169]	1	4					+	LF_L	28	28	28	45.2	45.2	45.2	105.77	0	247.27	9532500000	166	3.1026	0.000571429	-1.02455	-6.2322	27.0497	26.7079	26.7808	26.7709	26.5979	26.9453	26.8476	26.7756	26.9648	27.2866	27.0447	26.9174	26.1957	26.2396	25.6164	26.0635
+	3.871	-1.04134	Q6ZQL4;Q68FC6;A0A3Q4EHN7;A0A3Q4EGD3	Q6ZQL4;Q68FC6;A0A3Q4EHN7	WD repeat-containing protein 43	Wdr43	Q6ZQL4;Q68FC6;A0A3Q4EHN7	Color2 [A=255, R=169, G=169, B=169]	1	4					+	LF_L	18	18	18	42.7	42.7	42.7	75.38	0	149.5	12991000000	162	3.871	0	-1.04134	-8.61522	28.1198	27.5568	27.8584	27.6853	27.5743	28.0521	27.6849	27.7998	28.3412	28.4937	28.5555	28.2641	27.6183	27.427	27.143	27.3008
+	3.06281	-1.8382	A0A068BIU7;A0A068BFS0;Q3UM80;Q8R0T3;Q9Z0H1;A0A3Q4EBZ6	A0A068BIU7;A0A068BFS0;Q3UM80;Q8R0T3;Q9Z0H1	WD repeat-containing protein 46	Wdr46	A0A068BIU7;A0A068BFS0;Q3UM80;Q8R0T3;Q9Z0H1	Color2 [A=255, R=169, G=169, B=169]	1	4					+	LF_L	11	11	11	31.3	31.3	31.3	63.678	0	71.097	4356200000	68	3.06281	0.000652542	-1.8382	-6.12506	27.1203	26.6137	26.7839	26.4836	26.0568	26.8024	26.7133	26.8425	27.1148	27.5332	27.3585	26.9494	25.6217	26.0554	24.863	25.063
+	3.75797	-2.0869	Q8VCG3;Q3UL50;Q8R3V4	Q8VCG3;Q3UL50;Q8R3V4	WD repeat-containing protein 74	Wdr74	Q8VCG3;Q3UL50;Q8R3V4	Color2 [A=255, R=169, G=169, B=169]	1	4					+	LF_L	7	7	7	20.8	20.8	20.8	42.636	0	25.648	2698900000	37	3.75797	0	-2.0869	-8.22323	26.6999	26.3564	26.1295	26.4078	26.0676	26.3525	26.0858	26.4452	27.102	27.6345	26.9428	27.2238	25.4296	25.5131	24.9862	24.6265
+	2.29675	-1.46129	Q3TQZ0;Q3U821;Q3TI30;Q3THS2;Q9CRF5;Q7TMM0;Q3MIA1;Q6IS38;D3Z504	Q3TQZ0;Q3U821;Q3TI30;Q3THS2;Q9CRF5;Q7TMM0		Wdr75	Q3TQZ0;Q3U821;Q3TI30;Q3THS2;Q9CRF5;Q7TMM0	Color2 [A=255, R=169, G=169, B=169]	1	4					+	LF_L	22	22	22	33.5	33.5	33.5	93.805	0	123.8	10460000000	178	2.29675	0.00548357	-1.46129	-4.30781	27.4089	26.9517	26.7704	26.8919	26.7214	27.1621	27.0178	26.925	27.4309	27.5683	27.3163	27.2258	26.6718	26.2786	25.2666	25.4792
+	3.84004	-4.37903	Q3UL31;Q6NZF1;Q3TIV2;Q3UZ63;A0A0A6YXN6;A0A0A6YXI9;A0A0A6YWW2;A0A0A6YX41;A0A0A6YX93	Q3UL31;Q6NZF1;Q3TIV2;Q3UZ63	Zinc finger CCCH domain-containing protein 11A	Zc3h11a	Q3UL31;Q6NZF1;Q3TIV2;Q3UZ63	Color2 [A=255, R=169, G=169, B=169]	1	4					+	LF_L	20	20	19	42.3	42.3	40.4	86.491	0	122.47	4866400000	83	3.84004	0	-4.37903	-8.50627	23.955	24.3983	24.4732	24.6014	24.2706	24.3934	24.0305	23.9132	27.3795	28.0214	27.5889	27.4135	22.3609	22.5648	23.4356	24.5259
